# Supplementary material for: Endothelial progenitor cells stimulate neonatal lung angiogenesis through FOXF1-mediated activation of BMP9/ACVRL1 signaling
Source: Nat Commun. 2022 Apr 19;13:2080. doi: 10.1038/s41467-022-29746-y (PMC9019054; doi:10.1038/s41467-022-29746-y)
Supplement: Supplementary file 1 — Supplementary information [file 41467_2022_29746_MOESM1_ESM.pdf]

## SUPPLEMENTAL MATERIALS

### **Endothelial Progenitor Cells Stimulate Neonatal Lung Angiogenesis through FOXF1-Mediated Activation of BMP9/ACVRL1 Signaling**

Guolun Wang<sup>1</sup>, Bingqiang Wen<sup>1</sup>, Zicheng Deng<sup>1,2</sup>, Yufang Zhang<sup>1</sup>, Olena A. Kolesnichenko<sup>1</sup>, Vladimir Ustiyan<sup>1</sup>, Arun Pradhan<sup>1</sup>, Tanya V. Kalin<sup>3,4</sup> and Vladimir V. Kalinichenko<sup>1,3,4,5</sup>

<sup>1</sup>*Center for Lung Regenerative Medicine, Perinatal Institute, Cincinnati Children's Hospital Medical Center, Cincinnati, USA.*

<sup>2</sup>*The Materials Science and Engineering Program, College of Engineering and Applied Science, University of Cincinnati, Cincinnati, USA.*

<sup>3</sup>*Division of Pulmonary Biology, Cincinnati Children's Hospital Medical Center, Cincinnati, USA.*

<sup>4</sup>*Department of Pediatrics, University of Cincinnati, Cincinnati Children's Hospital Medical Center, Cincinnati, USA.*

<sup>5</sup>*Division of Developmental Biology, Cincinnati Children's Hospital Medical Center, Cincinnati, USA.*

## SUPPLEMENTAL TABLES

### Supplemental Table 1. Mouse genes with decreased expression in *Foxfl<sup>WT/S52F</sup>* gCAPs

compared to *WT* gCAPs, Wilcoxon Rank Sum test implemented via the function FindMarkers in Seurat package was used for data analysis.

| Genes          | Annotation                                 | p_val_adj | avg_logFC  |
|----------------|--------------------------------------------|-----------|------------|
| <i>Scn7a</i>   | sodium voltage-gated channel alpha 7       | 1.26E-05  | -1.1595084 |
| <i>Calcr1</i>  | calcitonin receptor like receptor          | 1.72E-04  | -1.041414  |
| <i>Id1</i>     | Id1                                        | 6.47E-06  | -0.7609647 |
| <i>Ace</i>     | angiotensin I converting enzyme            | 6.46E-04  | -0.7324971 |
| <i>Prx</i>     | periaxin                                   | 1.37E-02  | -0.7135365 |
| <i>Aqp1</i>    | aquaporin 1                                | 1.85E-03  | -0.6940737 |
| <i>Impdh1</i>  | inosine monophosphate dehydrogenase 1      | 1.02E-02  | -0.6768223 |
| <i>Guk1</i>    | guanylate kinase 1                         | 4.24E-02  | -0.6750678 |
| <i>Clec14a</i> | C-type lectin domain containing 14A        | 7.80E-05  | -0.6744908 |
| <i>Emilin1</i> | elastin microfibril interfacier 1          | 6.60E-03  | -0.6699169 |
| <i>Thbd</i>    | thrombomodulin                             | 1.00E-03  | -0.6689993 |
| <i>Akap5</i>   | A-kinase anchoring protein 5               | 3.00E-04  | -0.6643067 |
| <i>Icam2</i>   | intercellular adhesion molecule 2          | 1.44E-04  | -0.662177  |
| <i>Bcam</i>    | basal cell adhesion molecule               | 1.73E-02  | -0.6497749 |
| <i>Pltp</i>    | phospholipid transfer protein              | 3.71E-04  | -0.6299058 |
| <i>Gja4</i>    | gap junction protein alpha 4               | 4.64E-02  | -0.5994817 |
| <i>Pmp22</i>   | peripheral myelin protein 22               | 8.97E-04  | -0.5932426 |
| <i>Acvrl1</i>  | activin A receptor like type 1             | 1.56E-03  | -0.5744891 |
| <i>Pcdh1</i>   | protocadherin 1                            | 9.40E-03  | -0.5699518 |
| <i>Pgrmc1</i>  | progesterone receptor membrane component 1 | 1.22E-02  | -0.5422058 |
| <i>Emc3</i>    | ER membrane protein complex subunit 3      | 8.14E-03  | -0.5385768 |
| <i>Hilpda</i>  | hypoxia inducible lipid droplet associated | 7.56E-02  | -0.5359901 |
| <i>Kitl</i>    | KIT ligand                                 | 5.83E-02  | -0.5286402 |
| <i>Stmn2</i>   | stathmin 2                                 | 7.81E-03  | -0.5242799 |
| <i>Serinc3</i> | serine incorporator 3                      | 3.45E-03  | -0.523888  |
| <i>Bcap31</i>  | B cell receptor associated protein 31      | 1.71E-02  | -0.5194915 |
| <i>Agrn</i>    | agrin                                      | 5.60E-03  | -0.5180866 |
| <i>Adgre5</i>  | adhesion G protein-coupled receptor E5     | 1.38E-02  | -0.5159666 |
| <i>Mpzl1</i>   | myelin protein zero like 1                 | 1.76E-02  | -0.5081411 |
| <i>Erlec1</i>  | endoplasmic reticulum lectin 1             | 1.76E-02  | -0.5072873 |
| <i>Id3</i>     | Id3                                        | 2.46E-02  | -0.5062088 |

|                 |                                                          |          |            |
|-----------------|----------------------------------------------------------|----------|------------|
| <i>Abhd17c</i>  | depalmitoylase                                           | 5.64E-03 | -0.4982948 |
| <i>Nid1</i>     | nidogen 1                                                | 2.74E-02 | -0.4968771 |
| <i>Ehd4</i>     | EH domain containing 4                                   | 3.18E-02 | -0.4946315 |
| <i>Tmem2</i>    | Hyaluronidase                                            | 2.05E-02 | -0.493116  |
| <i>Rdx</i>      | radixin                                                  | 8.95E-03 | -0.4904556 |
| <i>Rcn2</i>     | reticulocalbin 2                                         | 3.77E-03 | -0.487199  |
| <i>Ptprm</i>    | protein tyrosine phosphatase receptor type M             | 2.07E-02 | -0.4857461 |
| <i>Cdh5</i>     | cadherin 5                                               | 2.28E-02 | -0.484025  |
| <i>Tbx2</i>     | T-box transcription factor 2                             | 1.72E-02 | -0.4831394 |
| <i>Cav2</i>     | caveolin 2                                               | 1.95E-02 | -0.4822263 |
| <i>Stab1</i>    | stabilin 1                                               | 3.90E-02 | -0.479902  |
| <i>Cldn3</i>    | claudin 3                                                | 3.76E-02 | -0.4795833 |
| <i>Lyz2</i>     | Lysozyme C-2 precursor                                   | 1.91E-03 | -0.4795814 |
| <i>Rpn2</i>     | ribophorin II                                            | 3.04E-02 | -0.4777088 |
| <i>Slc16a2</i>  | solute carrier family 16 member 2                        | 1.76E-02 | -0.4760005 |
| <i>Tspan18</i>  | tetraspanin 18                                           | 1.84E-02 | -0.4740073 |
| <i>Saraf</i>    | calcium entry associated regulatory factor               | 1.18E-02 | -0.4735024 |
| <i>Tmem176b</i> | transmembrane protein 176B                               | 9.02E-03 | -0.4676268 |
| <i>Tor1aip1</i> | torsin 1A interacting protein 1                          | 2.24E-02 | -0.4667835 |
| <i>Tspan8</i>   | tetraspanin 8                                            | 2.17E-02 | -0.4640212 |
| <i>Daam1</i>    | dishevelled associated activator of morphogenesis 1      | 2.36E-02 | -0.4636584 |
| <i>Casz1</i>    | castor zinc finger 1                                     | 1.46E-02 | -0.4632158 |
| <i>Acap2</i>    | ArfGAP with coiled-coil, ankyrin repeat and PH domains 2 | 2.00E-02 | -0.4594823 |
| <i>Cpne8</i>    | copine 8                                                 | 2.50E-02 | -0.4582557 |
| <i>Arl8b</i>    | ADP ribosylation factor like GTPase 8B                   | 1.19E-02 | -0.4569753 |
| <i>Ptpn4</i>    | protein tyrosine phosphatase non-receptor type 4         | 2.74E-03 | -0.4567502 |
| <i>Lfng</i>     | LFNG O-fucosylpeptide acetylglucosaminyltransferase      | 2.01E-02 | -0.4546993 |
| <i>Itga1</i>    | integrin subunit alpha 1                                 | 2.56E-02 | -0.4539738 |
| <i>Podxl</i>    | podocalyxin like                                         | 3.02E-02 | -0.4539606 |
| <i>Sar1b</i>    | secretion associated Ras related GTPase 1B               | 2.27E-02 | -0.4538727 |
| <i>Armxc4</i>   | armadillo repeat containing X-linked 4                   | 2.36E-02 | -0.4536357 |
| <i>Tceal8</i>   | transcription elongation factor A like 8                 | 5.21E-02 | -0.4510441 |
| <i>Ptgfrn</i>   | prostaglandin F2 receptor inhibitor                      | 7.06E-02 | -0.4500174 |
| <i>Yipf3</i>    | Yip1 domain family member 3                              | 2.15E-02 | -0.4483878 |
| <i>Fam189a2</i> | family with sequence similarity 189 member A2            | 2.71E-02 | -0.4459024 |
| <i>Sftpd</i>    | surfactant protein D                                     | 3.71E-02 | -0.4445538 |
| <i>Krt18</i>    | keratin 18                                               | 1.94E-02 | -0.443645  |
| <i>Tm4sf1</i>   | transmembrane 4 L six family member 1                    | 4.46E-02 | -0.4435192 |
| <i>Plin2</i>    | perilipin 2                                              | 4.97E-02 | -0.4384208 |

|                 |                                                          |          |            |
|-----------------|----------------------------------------------------------|----------|------------|
| <i>Tmem213</i>  | transmembrane protein 213                                | 1.99E-02 | -0.4374779 |
| <i>Pam</i>      | peptidylglycine alpha-amidating monooxygenase            | 6.17E-03 | -0.4371594 |
| <i>Faf1</i>     | Fas associated factor 1                                  | 1.93E-02 | -0.4364524 |
| <i>Hsd17b4</i>  | hydroxysteroid 17-beta dehydrogenase 4                   | 3.74E-02 | -0.4320081 |
| <i>Cd151</i>    | CD151 molecule                                           | 5.03E-02 | -0.4304046 |
| <i>S100a14</i>  | S100 calcium binding protein A14                         | 1.27E-02 | -0.4297003 |
| <i>Dll4</i>     | delta like canonical Notch ligand 4                      | 8.92E-02 | -0.4276322 |
| <i>F11r</i>     | F11 receptor                                             | 1.38E-02 | -0.4262241 |
| <i>Chchd10</i>  | coiled-coil-helix-coiled-coil-helix domain containing 10 | 5.32E-02 | -0.4254025 |
| <i>Ecscr</i>    | endothelial cell surface and apoptosis regulator         | 5.67E-03 | -0.4225633 |
| <i>Tmem100</i>  | transmembrane protein 100                                | 4.32E-04 | -0.4182826 |
| <i>Ly6e</i>     | lymphocyte antigen 6 family member E                     | 2.39E-03 | -0.4177506 |
| <i>Kctd10</i>   | potassium channel tetramerization domain containing 10   | 1.57E-02 | -0.4173224 |
| <i>Ramp2</i>    | receptor activity modifying protein 2                    | 5.21E-04 | -0.4162491 |
| <i>Colgalt1</i> | collagen $\beta$ -galactosyltransferase 1                | 5.18E-02 | -0.4122362 |
| <i>Tmed10</i>   | transmembrane p24 trafficking protein 10                 | 2.87E-02 | -0.4121418 |
| <i>Nradd</i>    | Death domain-containing membrane protein NRADD           | 5.21E-03 | -0.4115611 |
| <i>Tfpi</i>     | tissue factor pathway inhibitor                          | 1.74E-02 | -0.4100548 |
| <i>Pbxip1</i>   | PBX homeobox interacting protein 1                       | 3.45E-02 | -0.4094844 |
| <i>Mif4gd</i>   | MIF4G domain containing                                  | 1.54E-02 | -0.4086005 |
| <i>Eif3m</i>    | eukaryotic translation initiation factor 3 subunit M     | 3.94E-02 | -0.408302  |
| <i>B2m</i>      | $\beta$ -2-microglobulin                                 | 2.16E-02 | -0.4065702 |

**Supplemental Table 2.** Mouse genes with increased expression in *Foxf1*<sup>WT/S52F</sup> gCAPs

compared to *WT* gCAPs, Wilcoxon Rank Sum test implemented via the function FindMarkers in

Seurat package was used for data analysis.

| Genes                | Annotation                                             | p_val adj | avg_logFC  |
|----------------------|--------------------------------------------------------|-----------|------------|
| <i>Ndnf</i>          | neuron derived neurotrophic factor                     | 2.16E-03  | 0.76654559 |
| <i>Rbp7</i>          | retinol binding protein 7                              | 1.48E-03  | 0.76318541 |
| <i>Rbp1</i>          | retinol binding protein 1                              | 7.07E-06  | 0.72806533 |
| <i>Pnlsr</i>         | PNN interacting serine and arginine rich protein       | 6.02E-05  | 0.69723989 |
| <i>Ppp1r14a</i>      | protein phosphatase 1 regulatory inhibitor subunit 14A | 7.01E-06  | 0.69127027 |
| <i>Kmt2e</i>         | lysine methyltransferase 2E                            | 5.94E-06  | 0.66629169 |
| <i>Ebf1</i>          | EBF transcription factor 1                             | 4.55E-03  | 0.65330788 |
| <i>Tnrc6a</i>        | trinucleotide repeat containing adaptor 6A             | 5.08E-05  | 0.64319892 |
| <i>Taf1</i>          | TATA-box binding protein associated factor 1           | 1.77E-02  | 0.64298204 |
| <i>Ubn2</i>          | ubiquitin 2                                            | 8.96E-07  | 0.63664304 |
| <i>3830406C13Rik</i> | chromosome 3 open reading frame 14                     | 1.32E-03  | 0.62265351 |
| <i>Sgk1</i>          | serum/glucocorticoid regulated kinase 1                | 1.13E-04  | 0.61928485 |
| <i>Colla1</i>        | collagen type I alpha 1 chain                          | 7.06E-03  | 0.61336275 |
| <i>Rragc</i>         | Ras related GTP binding C                              | 1.68E-05  | 0.6092144  |
| <i>Brd4</i>          | bromodomain containing 4                               | 2.15E-04  | 0.60900764 |
| <i>Srrt</i>          | serrate, RNA effector molecule                         | 1.30E-03  | 0.6026708  |
| <i>Supt20</i>        | SPT20 homolog, SAGA complex component                  | 8.42E-03  | 0.59879275 |
| <i>Bola2</i>         | bola family member 2                                   | 6.65E-05  | 0.59853836 |
| <i>Kcnq1ot1</i>      | KCNQ1 opposite strand/antisense transcript 1           | 4.43E-03  | 0.59852063 |
| <i>Klhl9</i>         | kelch like family member 9                             | 1.07E-04  | 0.59139999 |
| <i>Sh3bgrl</i>       | SH3 domain binding glutamate rich protein like         | 4.90E-04  | 0.58110633 |
| <i>Safb2</i>         | scaffold attachment factor B2                          | 1.11E-03  | 0.57904685 |
| <i>Chd2</i>          | chromodomain helicase DNA binding protein 2            | 5.77E-04  | 0.57751316 |
| <i>Tcf7l1</i>        | transcription factor 7 like 1                          | 2.59E-03  | 0.57257241 |
| <i>N4bp2l2</i>       | NEDD4 binding protein 2 like 2                         | 7.74E-04  | 0.56730607 |
| <i>Prrc2c</i>        | proline rich coiled-coil 2C                            | 2.80E-05  | 0.56160247 |
| <i>Utrn</i>          | utrophin                                               | 6.07E-03  | 0.56091269 |
| <i>Coq7</i>          | coenzyme Q7, hydroxylase                               | 6.92E-04  | 0.56073223 |
| <i>Srrm2</i>         | serine/arginine repetitive matrix 2                    | 8.69E-04  | 0.55116625 |
| <i>Tef</i>           | TEF transcription factor, PAR bZIP family member       | 2.85E-02  | 0.54956929 |
| <i>Palm</i>          | paralemmin                                             | 5.04E-04  | 0.5486286  |
| <i>Dusp1</i>         | dual specificity phosphatase 1                         | 8.94E-04  | 0.54594957 |
| <i>Adamts9</i>       | ADAM metalloproteinase with thrombospondin motif 9     | 4.75E-03  | 0.54253029 |

|                 |                                            |          |            |
|-----------------|--------------------------------------------|----------|------------|
| <i>Dcaf13</i>   | DDB1 and CUL4 associated factor 13         | 2.39E-03 | 0.5419161  |
| <i>Ifitm1</i>   | interferon induced transmembrane protein 1 | 8.16E-03 | 0.53890677 |
| <i>Zfp207</i>   | zinc finger protein 207                    | 4.14E-03 | 0.53345352 |
| <i>Tmpo</i>     | thymopoietin                               | 1.73E-03 | 0.53248504 |
| <i>Zc3h15</i>   | zinc finger CCCH-type containing 15        | 9.95E-06 | 0.52910164 |
| <i>Pfdn2</i>    | prefoldin subunit 2                        | 1.94E-04 | 0.5289352  |
| <i>Dab2ip</i>   | DAB2 interacting protein                   | 2.38E-02 | 0.52542226 |
| <i>Phb2</i>     | prohibitin 2                               | 3.32E-03 | 0.52272165 |
| <i>Limch1</i>   | LIM and calponin homology domains 1        | 1.56E-04 | 0.52014723 |
| <i>Atg101</i>   | autophagy related 101                      | 2.58E-03 | 0.51826269 |
| <i>Sqstm1</i>   | sequestosome 1                             | 1.24E-02 | 0.51372186 |
| <i>Pcbd2</i>    | pterin-4 alpha-carbinolamine dehydratase 2 | 6.22E-02 | 0.51081317 |
| <i>Tmem255a</i> | transmembrane protein 255A                 | 3.21E-04 | 0.51041205 |
| <i>Snhg9</i>    | small nucleolar RNA host gene 9            | 1.20E-03 | 0.50963362 |
| <i>Srp72</i>    | signal recognition particle 72             | 6.92E-02 | 0.50167931 |
| <i>Fkbp8</i>    | FKBP prolyl isomerase 8                    | 4.54E-04 | 0.5008499  |

**Supplemental Table 3.** Mouse genes from TGF $\beta$ /BMP signaling pathway expression of which is downregulated in *Foxf1*<sup>WT/S52F</sup> gCAPs, Wilcoxon Rank Sum test implemented via the function FindMarkers in Seurat package was used for data analysis.

| genes          | Annotation                          | p_val_adj | avg_logFC  |
|----------------|-------------------------------------|-----------|------------|
| <i>Acvrl1</i>  | activin A receptor like type 1      | 1.56E-03  | -0.5744891 |
| <i>Calclrl</i> | calcitonin receptor like receptor   | 1.72E-04  | -1.041414  |
| <i>Clec14a</i> | C-type lectin domain containing 14A | 7.80E-05  | -0.6744908 |
| <i>Emilin1</i> | elastin microfibril interfacer 1    | 6.60E-03  | -0.6699169 |
| <i>Id1</i>     | Inhibitor of DNA Binding 1          | 6.47E-06  | -0.7609647 |
| <i>Id3</i>     | Inhibitor of DNA Binding 3          | 2.46E-02  | -0.5062088 |
| <i>Pcdh1</i>   | protocadherin 1                     | 9.40E-03  | -0.5699518 |
| <i>Prx</i>     | periaxin                            | 1.37E-02  | -0.7135365 |
| <i>Stmn2</i>   | stathmin 2                          | 7.81E-03  | -0.5242799 |
| <i>Thbd</i>    | thrombomodulin                      | 1.00E-03  | -0.6689993 |
| <i>Tmem100</i> | transmembrane protein 100           | 4.32E-04  | -0.4182826 |

**Supplemental Table 4.** The top 10 genes enriched in *WT* FOXF1<sup>+</sup> gCAPs compared to *WT* FOXF1<sup>-</sup> gCAPs, Wilcoxon Rank Sum test implemented via the function FindMarkers in Seurat package was used for data analysis.

| Genes          | Annotation                             | avg_logFC  | p_val_adj |
|----------------|----------------------------------------|------------|-----------|
| <i>Foxf1</i>   | Forkhead Box F1                        | 1.2614674  | 1.78E-09  |
| <i>Mki67</i>   | marker of proliferation Ki-67          | 2.15379841 | 2.55E-13  |
| <i>Cxcl12</i>  | C-X-C motif chemokine ligand 12        | 1.90661208 | 7.13E-09  |
| <i>Kit</i>     | KIT proto-oncogene                     | 1.38418802 | 4.19E-12  |
| <i>Sparcl1</i> | SPARC like 1                           | 1.21722705 | 8.21E-14  |
| <i>Clec1a</i>  | C-type lectin domain family 1 member A | 1.14760479 | 1.83E-16  |
| <i>Gja4</i>    | gap junction protein alpha 4           | 1.03271656 | 1.53E-07  |
| <i>Lpl</i>     | lipoprotein lipase                     | 0.99784264 | 1.72E-06  |
| <i>Atp13a3</i> | ATPase 13A3                            | 0.95074354 | 3.96E-10  |
| <i>Car2</i>    | carbonic anhydrase 2                   | 1.1179714  | 1.18E-11  |
| <i>Guk1</i>    | guanylate kinase 1                     | 1.00858445 | 4.62E-07  |

**Supplemental Table 5.** The top 10 genes enriched in *WT* FOXF1<sup>-</sup> gCAPs compared to *WT* FOXF1<sup>+</sup> gCAPs, Wilcoxon Rank Sum test implemented via the function FindMarkers in Seurat package was used for data analysis.

| Genes         | Annotation                             | avg_logFC  | p_val_adj  |
|---------------|----------------------------------------|------------|------------|
| <i>Fbln5</i>  | fibulin 5                              | 2.01204657 | 4.8562E-21 |
| <i>Adgrg6</i> | adhesion G protein-coupled receptor G6 | 1.78673214 | 1.19E-15   |
| <i>Ltbp4</i>  | latent TGFbeta binding protein 4       | 1.76309316 | 2.6156E-22 |
| <i>Mmp2</i>   | matrix metalloproteinase 2             | 1.49081924 | 3.22E-18   |
| <i>Car8</i>   | carbonic anhydrase 8                   | 1.42904566 | 2.042E-14  |
| <i>Ackr3</i>  | atypical chemokine receptor 3          | 1.34393242 | 1.0378E-19 |
| <i>Plac8</i>  | placenta associated 8                  | 1.20215519 | 7.1083E-20 |
| <i>Eln</i>    | elastin                                | 1.19761339 | 4.8213E-21 |
| <i>Fbln2</i>  | fibulin 2                              | 1.17566814 | 4.7209E-05 |
| <i>Hhip</i>   | hedgehog interacting protein           | 1.16070174 | 2.5673E-12 |

**Supplemental Table 6.** Mortality rates in *Foxf1*<sup>WT/S52F</sup> and *WT* mice after BMP9 treatment.

| Mice                    | Untreated (n=236)               | Saline (n=21)                    |                                 | BMP9 (n=42)                      |                                 |
|-------------------------|---------------------------------|----------------------------------|---------------------------------|----------------------------------|---------------------------------|
| Genotype of mice        | <i>Foxf1</i> <sup>WT/S52F</sup> | <i>Foxf1</i> <sup>+/+</sup> (WT) | <i>Foxf1</i> <sup>WT/S52F</sup> | <i>Foxf1</i> <sup>+/+</sup> (WT) | <i>Foxf1</i> <sup>WT/S52F</sup> |
| Number of mice at P3    | 236                             | 12                               | 9                               | 25                               | 17                              |
| Number of mice at P18   | 95                              | 11                               | 3                               | 23                               | 10                              |
| Mortality rate (P3-P18) | 59.75%                          | 8.33%                            | 66.67%                          | 8.00%                            | 41.18%                          |

**Supplemental Table 7.** Antibody list for immunostaining (IF), Western blot (WB) and Flow cytometry (FC).

| Antibody    | Dilution | Conjugation     | Assay | Company      | Catlog No. |
|-------------|----------|-----------------|-------|--------------|------------|
| Foxf1       | 1:250    | N/A             | IF    | R&D          | AF4798     |
| GFP         | 1:400    | N/A             | IF    | Thermofisher | A11122     |
| ACVRL1      | 1:300    | N/A             | IF    | R&D          | AF770      |
| Eng(CD105)  | 1:200    | N/A             | IF    | Thermofisher | 14-1051-82 |
| pSmad1      | 1:250    | N/A             | IF    | Sigma        | AB3848     |
| Erg         | 1:500    | N/A             | IF    | Abcam        | ab92513    |
| Emcn        | 1:300    | N/A             | IF    | Abcam        | ab106100   |
| Hopx        | 1:250    | N/A             | IF    | SantaCruz    | sc30216    |
| Fibronectin | 1:250    | N/A             | IF    | R&D          | NBP1-91258 |
| ACVRL1      | 1:300    | Biotin          | FC    | R&D          | BAF770     |
| Kit         | 1:100    | Superbright 780 | FC    | Thermofisher | 78-1171-82 |
| CD31        | 1:100    | eFluor450       | FC    | Thermofisher | 48-0311-82 |
| CD45        | 1:100    | APC-eFluor780   | FC    | Thermofisher | 47-0451-82 |
| CD140a      | 1:100    | PE-Cy7          | FC    | Thermofisher | 25-1401-82 |
| Eng(CD105)  | 1:100    | APC             | FC    | Biolegend    | 120413     |
| CD45        | 1:100    | AF700           | FC    | Thermofisher | 56-0451-82 |
| CD31        | 1:100    | BV605           | FC    | Biolegend    | 102427     |
| CD326       | 1:100    | Percp-cy5.5     | FC    | Biolegend    | 118220     |
| Smad1       | 1:500    | N/A             | WB    | CST          | 9743       |
| pSmad1      | 1:500    | N/A             | WB    | CST          | 9516       |
| Smad2       | 1:500    | N/A             | WB    | SantaCruz    | sc-6032    |
| pSmad2      | 1:500    | N/A             | WB    | SantaCruz    | sc-11769   |
| Foxf1       | 1:600    | N/A             | WB    | R&D          | AF4798     |
| Actin       | 1:1000   | N/A             | WB    | SantaCruz    | sc47778    |

**Supplemental Table 8.** The Taqman primers used for qRT-PCR analysis.

| Target genes                    | Taqman assay Cat. No. |
|---------------------------------|-----------------------|
| <i>Pecam1</i>                   | Mm01242584_m1         |
| <i>Foxf1</i>                    | Mm00487497_m1         |
| <i>Acvrl1</i>                   | Mm00437432_m1         |
| <i>Acvr1</i>                    | Mm01331069_m1         |
| <i>Acvrl1b</i>                  | Mm00475713_m1         |
| <i>Bmpr1a</i>                   | Mm00477650_m1         |
| <i>Bmpr1b</i>                   | Mm01312643_m1         |
| <i>Tgfbr1</i>                   | Mm00436964_m1         |
| <i>Tmem100</i>                  | Mm00471352_m1         |
| <i>Bmpr2</i>                    | Mm00432134_m1         |
| <i>Eng</i>                      | Mm00468252_m1         |
| <i>Nkx2-1</i>                   | Mm00447558_m1         |
| <i>Kit</i>                      | Mm00445212_m1         |
| <i><math>\beta</math>-actin</i> | Mm00607939_s1         |
| <i>Id3</i>                      | Mm00492575_m1         |
| <i>Id1</i>                      | Mm03676649_s1         |
| <i>Carcrl</i>                   | Mm00516986_m1         |
| <i>Clec14a</i>                  | Mm00482102_s1         |

**Supplemental Table 9.** Primers used to construct the luciferase reporter plasmids.

| Primer name    | Oilgo sequence                                                                       |
|----------------|--------------------------------------------------------------------------------------|
| Acvrl1-400~F'  | ACTGGTACCAGAGCTGTGTAAGGTACCTACACAAACGTC                                              |
| Acvrl1-400~R'  | TCAGCTAGCCACTGCAACTGTTAGAGGGTAATAGGCCG                                               |
| Foxf1-350~F'   | TCCGGTACCCGGCCTGGCGCGCAGCGTCGGAGGCC                                                  |
| Foxf1-350~R'   | CAGGCTAGCACCAGTGCCTCCCCACTCACGTTCC                                                   |
| Acvrl1~80-F'   | CAATCTAAACAATCTTGATTCTGTTGCCGGCCTGGCGGGACCTGAATGGCAGGAAGTAAGGACAAGAGCCTGTTTATG       |
| Acvrl1~80-R'   | CTAGCATAAACAGGCTCTTGCTTACTTCTGCCATTAGGGTCCCGCCAGGCCGGCAACAGGAATCAAGATTGTTAGATTGGTAC  |
| Acvrl1mt~80-F' | CAATCTCCCCAATCTTGATTCTGTTGCCGGCCTGGCGGGACCTGAATGGCAGGAAGTAAGGACAAGAGCCTGGGGATG       |
| Acvrl1mt~80-R' | CTAGCATCCCCAGGCTCTTGCTTACTTCTGCCATTAGGGTCCCGCCAGGCCGGCAACAGGAATCAAGATTGGGGAGATTGGTAC |

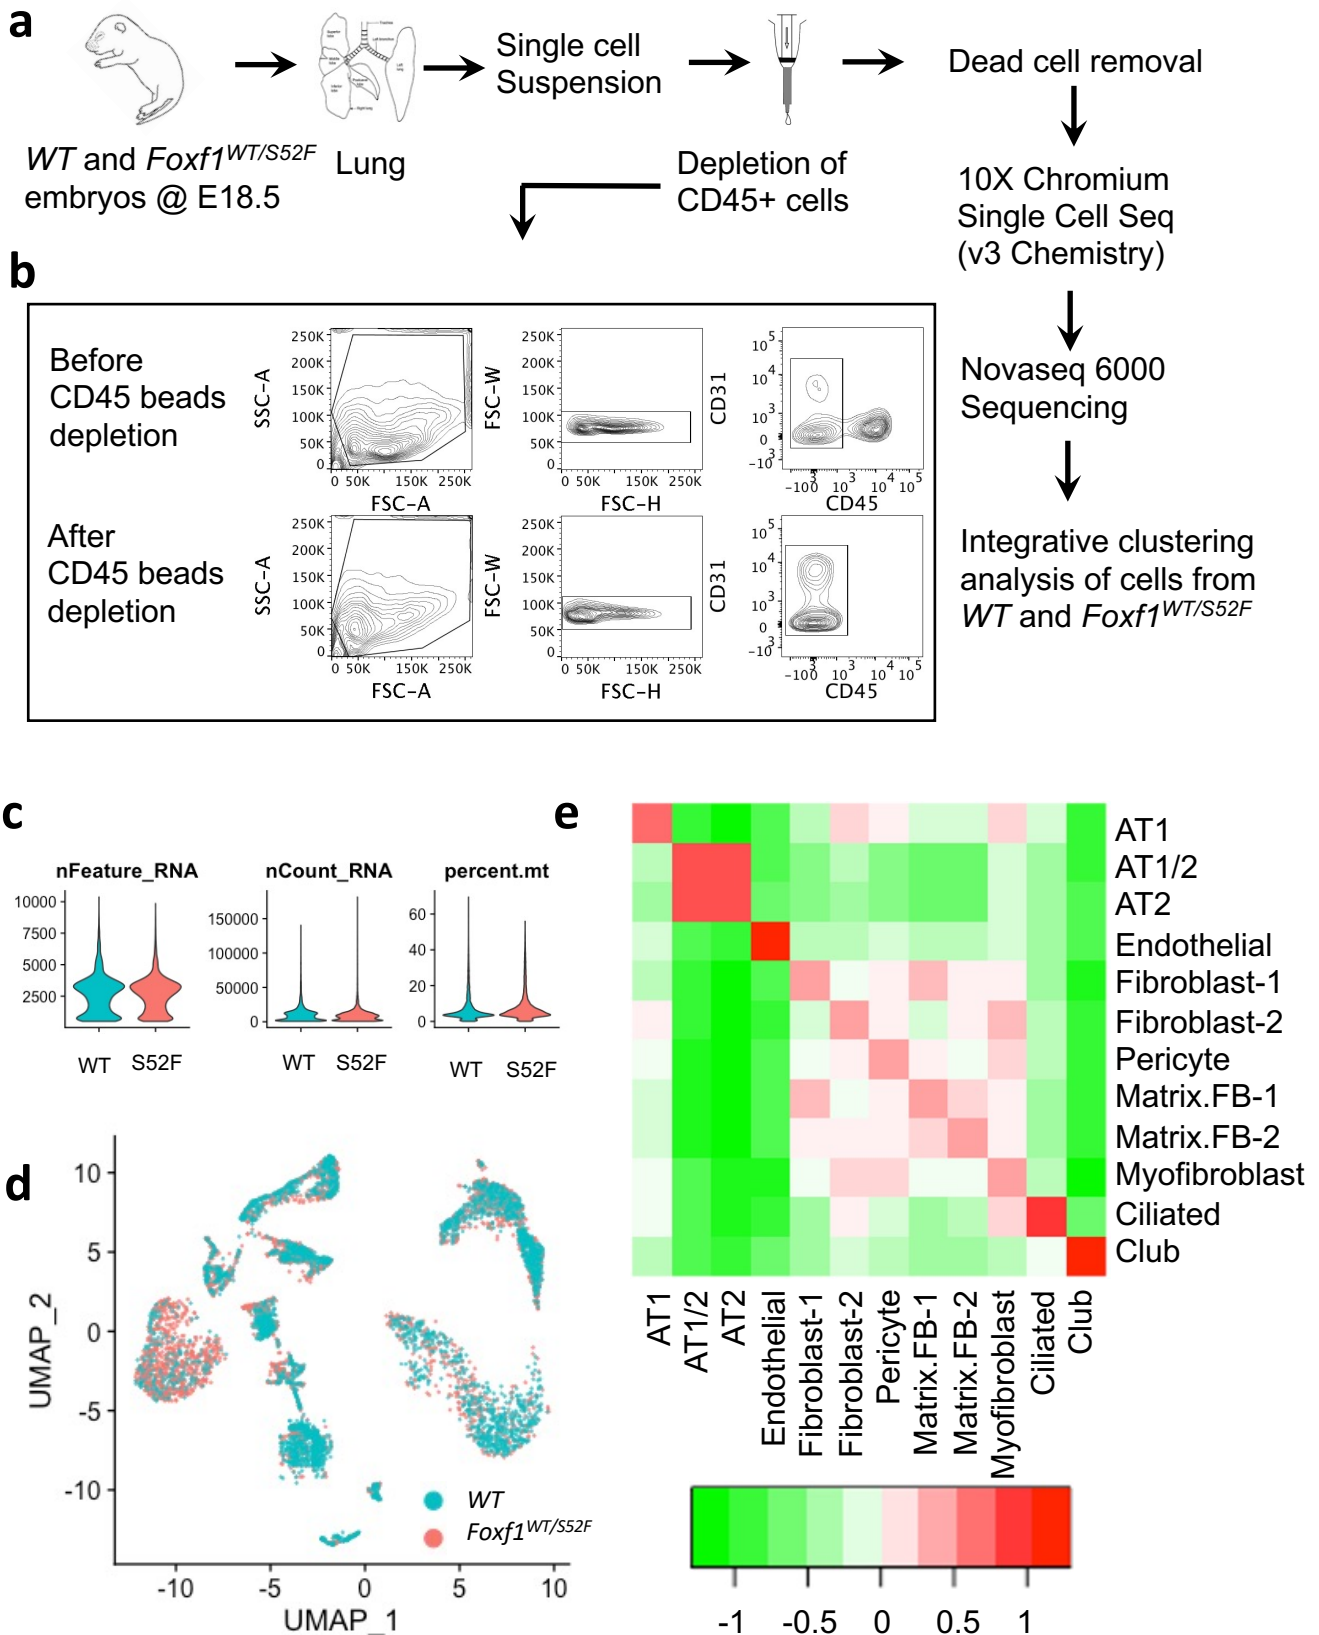

**Supplemental Figure 1. Integrated clustering of CD45<sup>-</sup> cells isolated from *WT* and *Foxf1*<sup>WT/S52F</sup> lungs.** *a*, Schematic shows the single cell preparation from *WT* and *Foxf1*<sup>WT/S52F</sup> E18.5 lungs followed by the library preparation and scRNAseq. *b*, FACS analysis shows the depletion of CD45<sup>+</sup> hematopoietic cells from lung cell suspensions. Depletion of hematopoietic cells was carried out using CD45-specific immunobeads. *c*, The comparison of raw data quality from scRNAseq analysis of *WT* and *Foxf1*<sup>WT/S52F</sup> E18.5 lungs. *d*, UMAP plot shows CD45<sup>-</sup> cell clusters in *WT* and *Foxf1*<sup>WT/S52F</sup> lungs. *e*, Correlation plot shows the integrated clustering of 12 pulmonary cell types, which was generated using a correlative matrix. Correlative matrix was produced from the average expression for all features across the clusters.

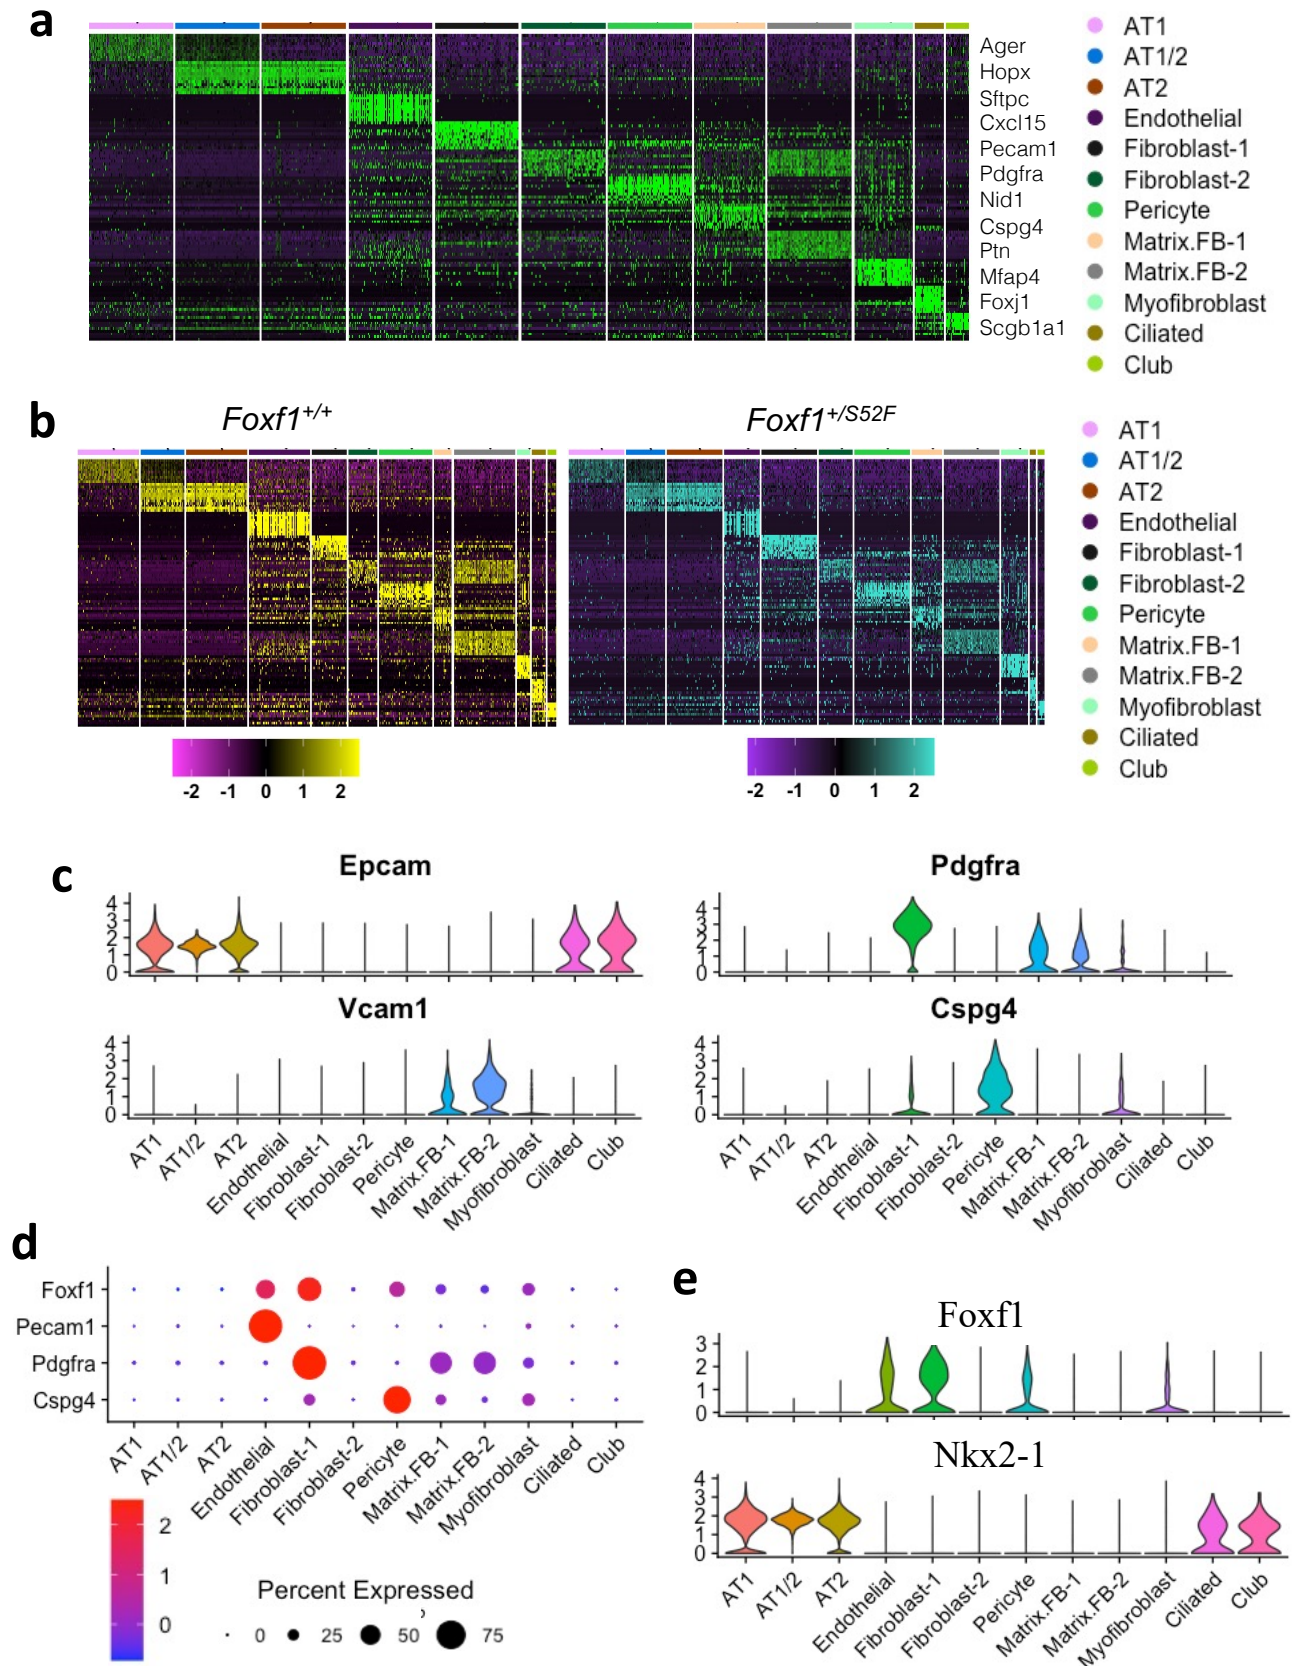

**Supplemental Figure 2. Comparison of gene expression signatures between *WT* and *Foxf1*<sup>WT/S52F</sup> lungs.** *a*, Integrated heatmap shows expression of 20 marker genes specific for each cell cluster. Cells from *WT* and *Foxf1*<sup>WT/S52F</sup> E18.5 lungs were combined together to generate the integrated heatmap. *b*, Parallel heatmaps show expression of 20 marker genes in each cell cluster from *WT* and *Foxf1*<sup>WT/S52F</sup> E18.5 lungs. *c*, Violin plots show expression of specific mRNAs for epithelial cells (*Epcam*), fibroblasts (*Pdgrfa*), matrix fibroblasts (*Vcam1*) and pericytes (*Cspg4*). Violin plots were generated using a combined pool of cells from *WT* and *Foxf1*<sup>WT/S52F</sup> lungs. *d-e*, scRNAseq data demonstrate that *Foxf1* mRNA is enriched in clusters of endothelial cells, fibroblast-1, pericytes and myofibroblasts. *Foxf1* is not detected in endoderm-derived epithelial cell lineages, including AT1, AT2, AT1/2, Club cells and Ciliated cells. Epithelial cell clusters are marked by *Nkx2-1* mRNA.

WT

*Foxf1*<sup>WT/S52F</sup>

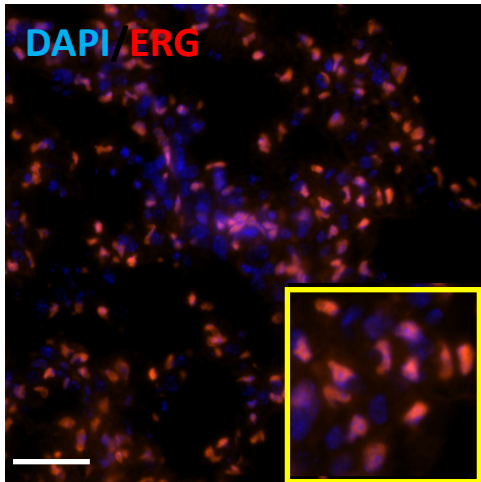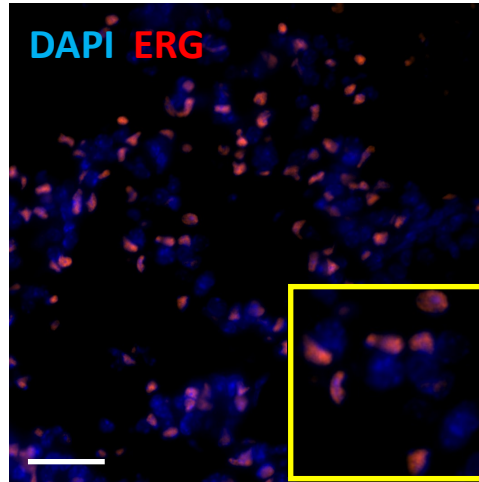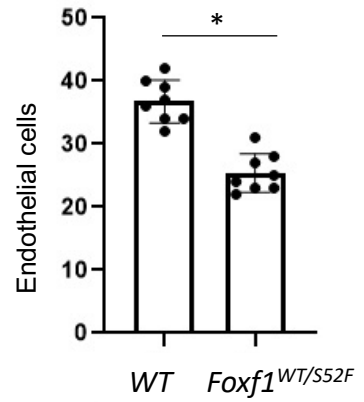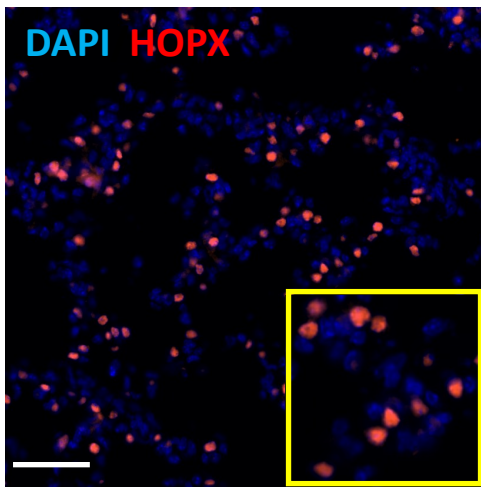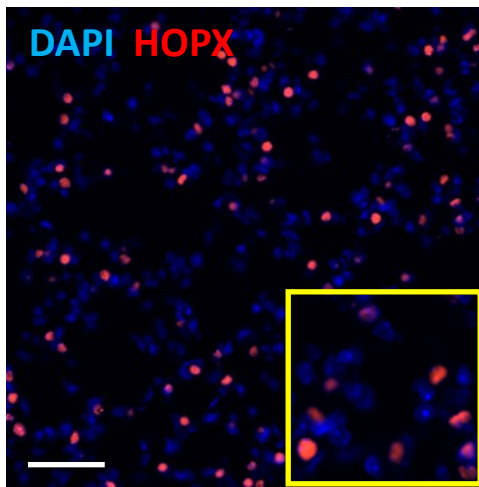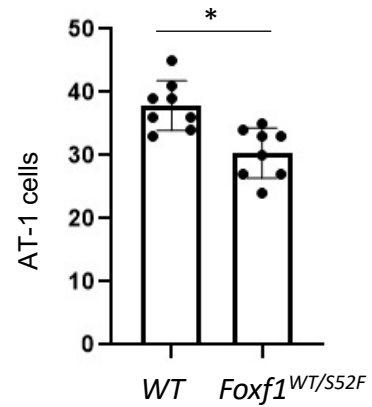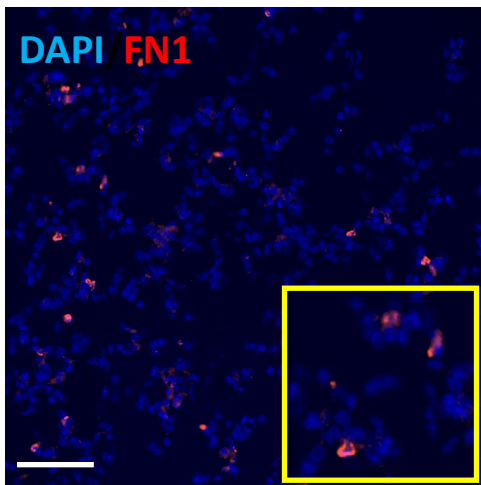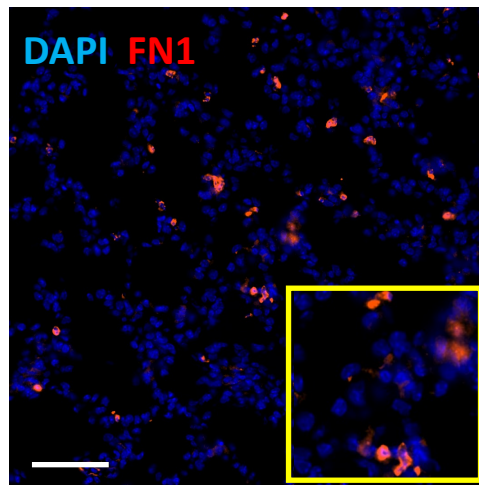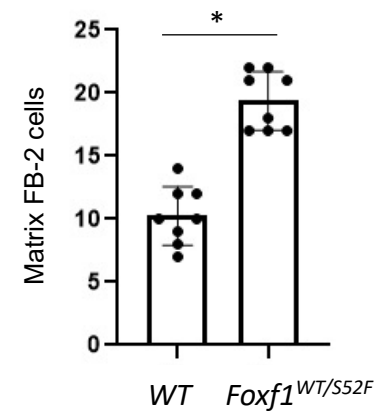

**Supplemental Figure 3. *Foxf1*<sup>WT/S52F</sup> lungs exhibit decreased numbers of endothelial and AT1 cells in the alveolar region.**

Immunostaining of *WT* and *Foxf1*<sup>WT/S52F</sup> E18.5 lungs was performed to identify endothelial cells (ERG antibody), AT1 cells (HOPX antibody) and Matrix. FB-2 cells (FN1 antibody). Lung sections were counterstained with DAPI. Compared to lungs of *WT* littermates, the percentages of endothelial and AT1 cells are decreased in *Foxf1*<sup>WT/S52F</sup> lungs, whereas the percentage of Matrix. FB-2 cells is increased (n=8 per group), Data were presented as mean  $\pm$  SD, and T-test (two-tailed) analyses were performed with GraphPad Prism, P values are 0.010006 (Endothelial), 0.018039 (AT1), 0.01165 (Matrix.FB-2). p<0.05 is \*, p<0.01 is \*\*. Scale bars are 20 $\mu$ m. Source data are provided as a Source Data file.

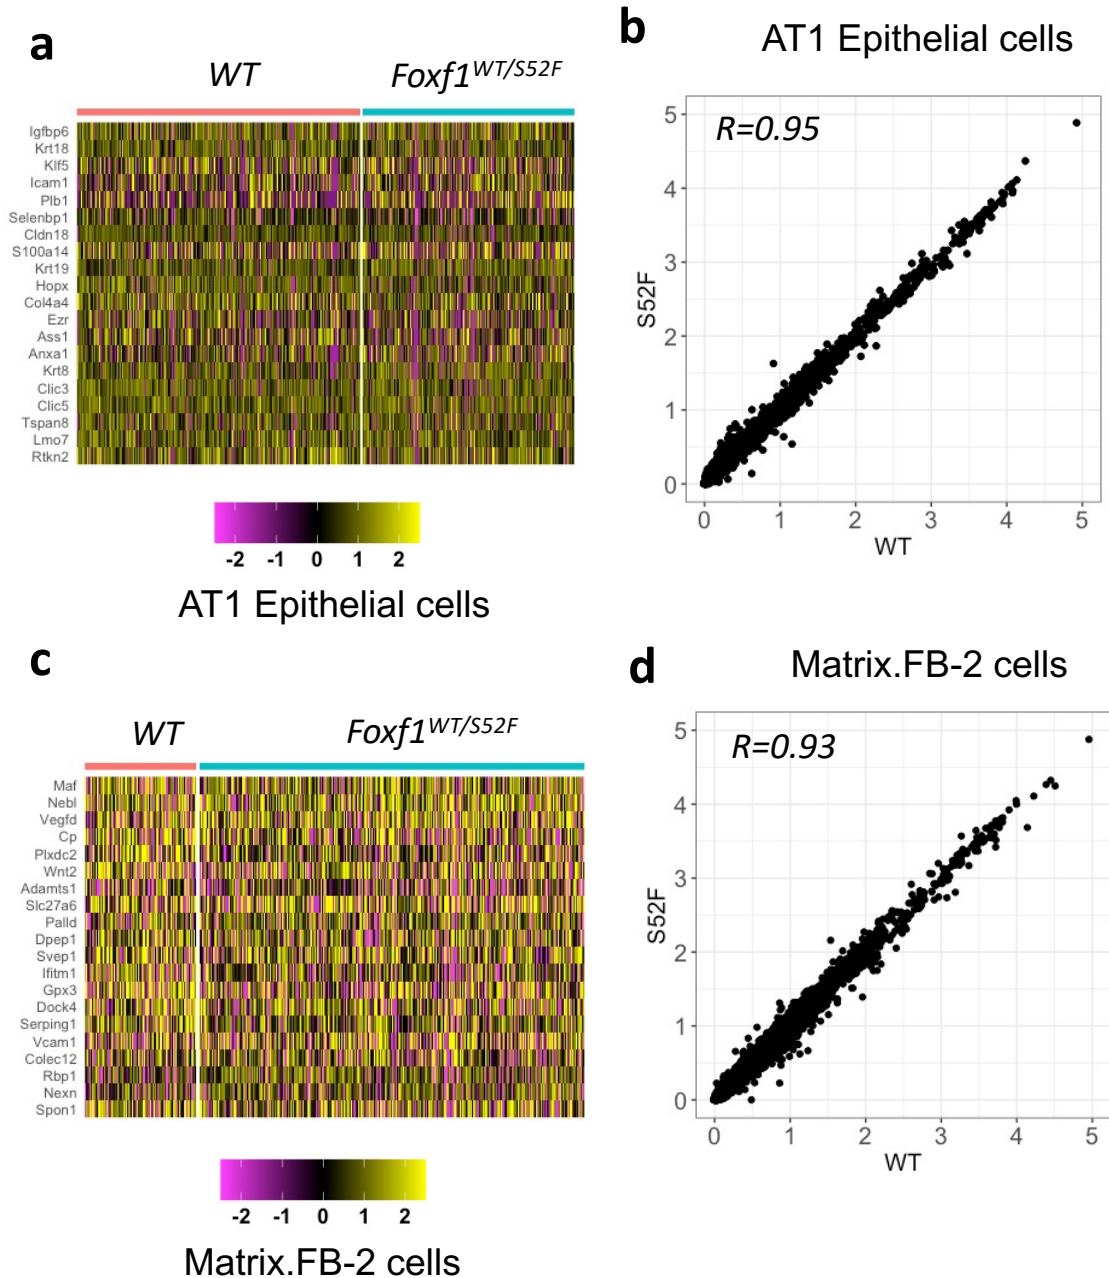

**Supplemental Figure 4. Gene signatures of AT1 and Matrix Fibroblasts 2 are similar between *WT* and *Foxf1*<sup>WT/S52F</sup> lungs.** Parallel heatmaps and correlation plots show that gene signatures of AT1 cells (a-b) and matrix fibroblasts 2 (Matrix.FB-2) (c-d) are similar between *WT* and *Foxf1*<sup>WT/S52F</sup> E18.5 lungs.

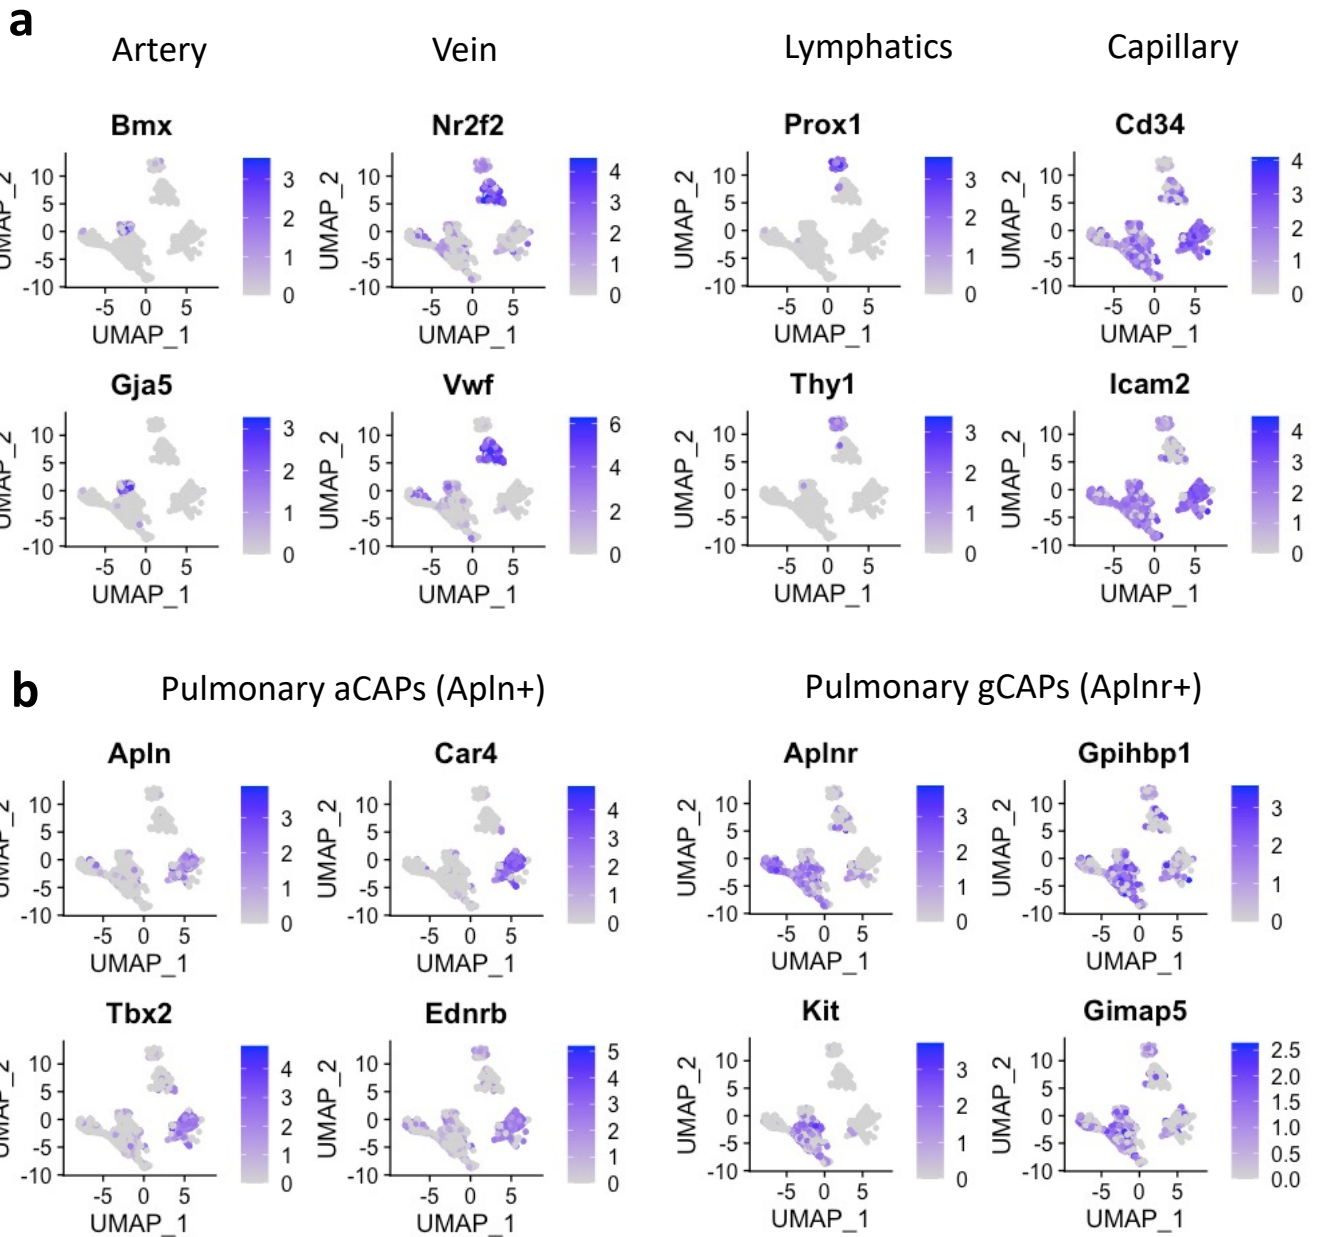

**Supplemental Figure 5. Endothelial marker genes identify clusters of arterial, venous, lymphatic and capillary endothelial cells in the mouse lung.** *a*, Plots show expression of marker genes that identify distinct endothelial cell clusters in the lung tissue. Cells from *WT* and *Foxf1*<sup>WT/S52F</sup> E18.5 lungs were combined together prior to UMAP clustering. Arterial endothelial cluster is identified by *Bmx* and *Gja5*. Venous endothelium is enriched in *Vwf* and *Nr2f2* mRNAs, whereas lymphatic endothelial cells express *Prox1* and *Thy1*. Capillary endothelial cells are enriched in *Icam2* and *Cd34* mRNAs. *b*, Plots show expression of *Car4*, *Tbx2*, *Apln* and *Ednrb* in aCAPs (aerocytes). gCAPs (general capillary cells) express *Aplnr*, *Gpihbp1*, *Kit* and *Gimap5*.

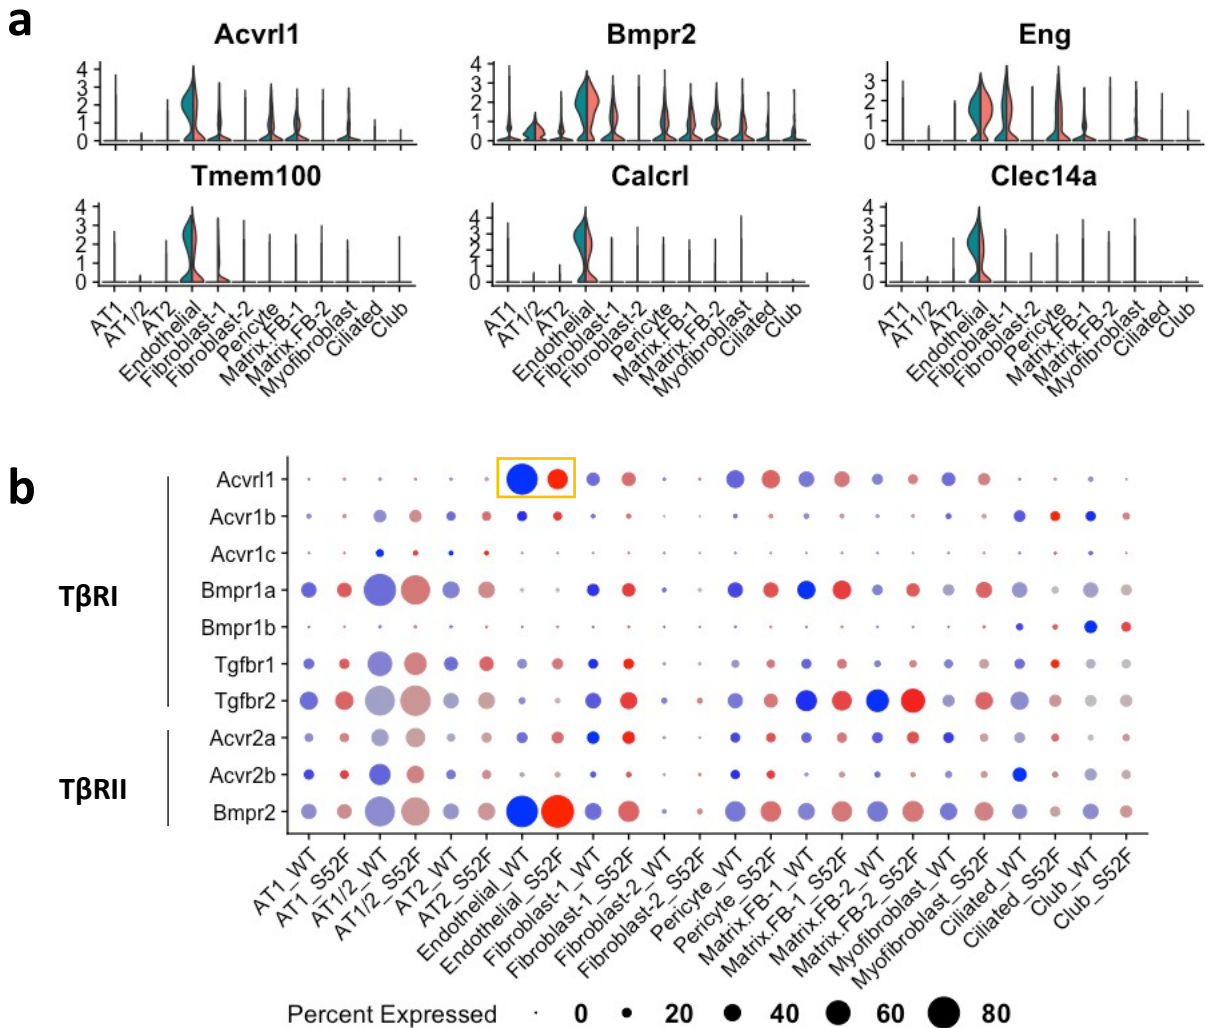

**Supplemental Figure 6. *Acvr1* mRNA is enriched in pulmonary endothelial cells.** *a*, Violin plots show an enrichment of *Acvr1* and its downstream target genes (*Tmem100*, *Calcrl* and *Clec14a*) in endothelial cell cluster. Expression of *Acvr1*, *Tmem100*, *Calcrl* and *Clec14a* is decreased in endothelial cells from *Foxf1*<sup>WT/S52F</sup> E18.5 lungs compared to *WT* controls. *Bmpr2* and *Eng* mRNAs are also present in endothelial cells, but their expression is not changed in *Foxf1*<sup>WT/S52F</sup> lungs. *b*, Expression levels of genes encoding Type I (TβRI) and Type II receptors (TβRII) of the TGFβ signaling pathway in pulmonary cell types. *Acvr1* mRNA is enriched in endothelial cells. Endothelial *Acvr1* expression is decreased in *Foxf1*<sup>WT/S52F</sup> lungs compared to *WT* controls.

*WT*

*Foxf1*<sup>WT/S52F</sup>

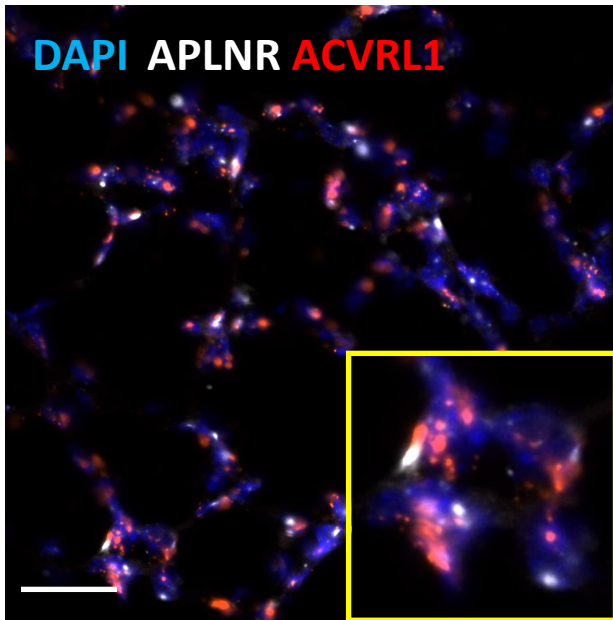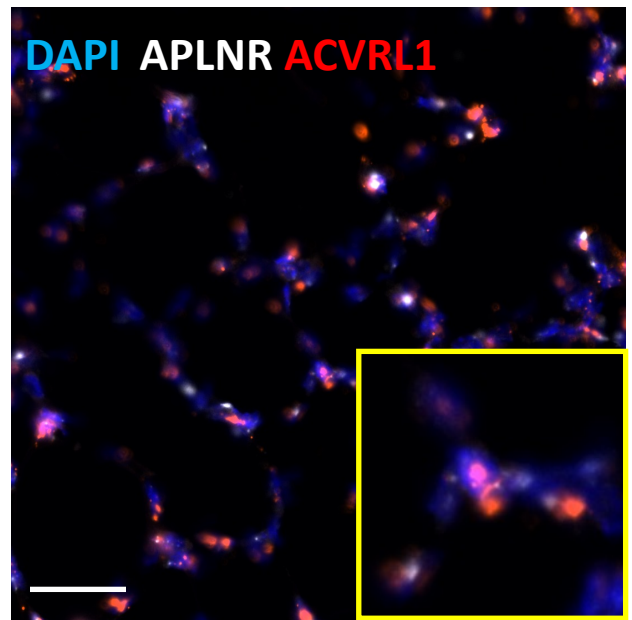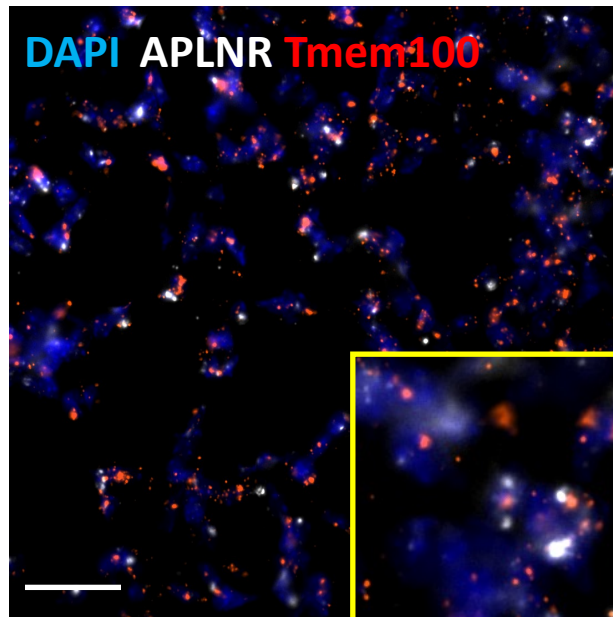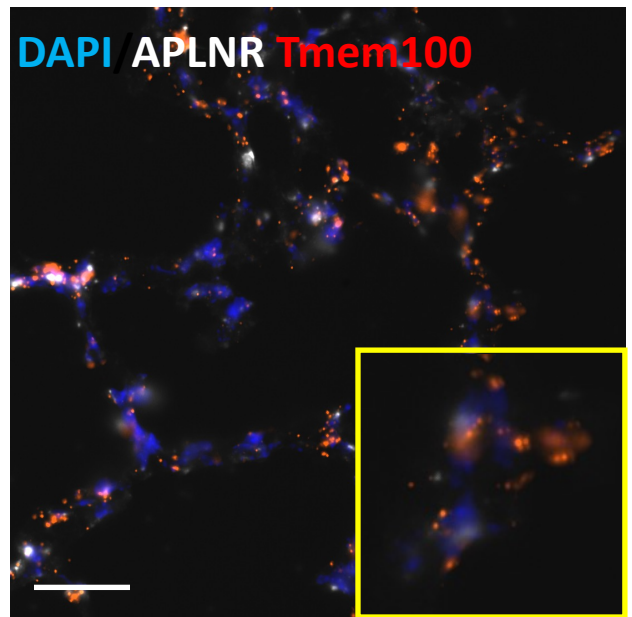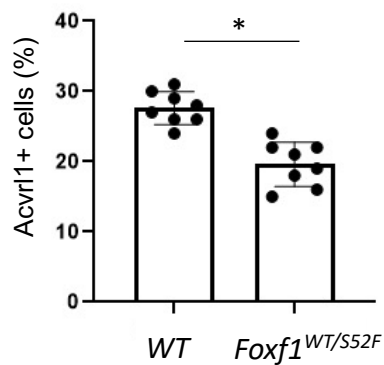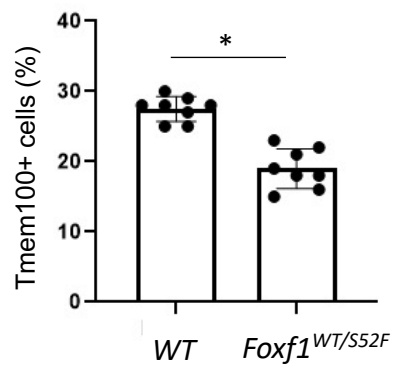

**Supplemental Figure 7. *Foxf1*<sup>WT/S52F</sup> lungs exhibit decreased numbers of cells expressing ACVRL1 and Tmem100.**

RNAscope of *WT* and *Foxf1*<sup>WT/S52F</sup> E18.5 lungs was performed using riboprobes specific *Aplnr*, *Acvrl1* and *Tmem100*. Lung sections were counterstained with DAPI. Compared to lungs of WT littermates, the percentages of cells expressing *Acvrl1* and *Tmem100* are decreased in *Foxf1*<sup>WT/S52F</sup> lungs (n=8 per group), Data were presented as mean  $\pm$  SD, and student's T-test (two-tailed) analyses were performed, p values are 0.018707 (*Acvrl1*), 0.01490 (*Tmem100*), p<0.05 is \*, p<0.01 is \*\*. Scale bars are 20 $\mu$ m.

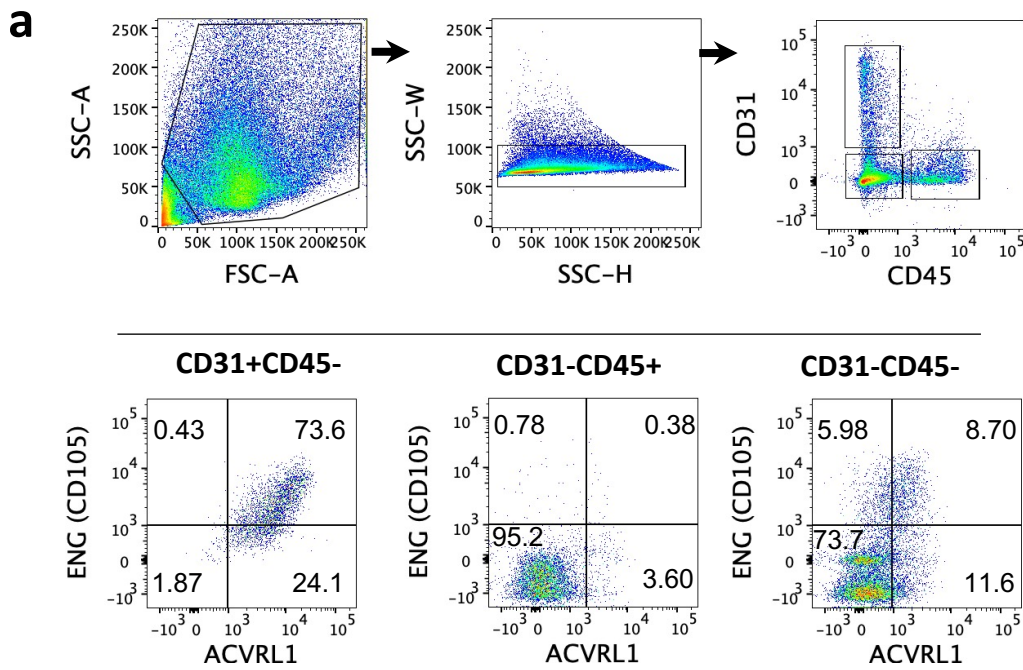

**b**

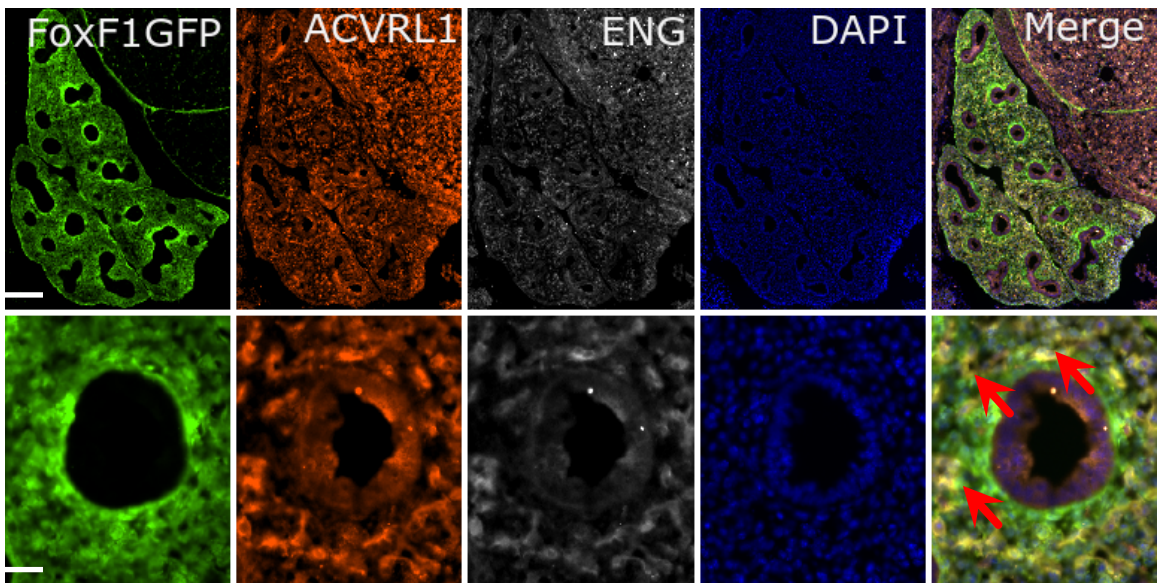

**Supplemental Figure 8. ACVRL1 and ENG receptors are co-expressed in FOXF1<sup>+</sup> endothelial cells in the mouse embryonic lung.**

*a*, FACS analysis shows that both ACVRL1 and ENG proteins are detected in CD31<sup>+</sup>CD45<sup>-</sup> pulmonary endothelial cells but not in CD45<sup>+</sup>CD31<sup>-</sup> hematopoietic cells. *b*, Immunostaining shows that *Foxf1-GFP* reporter co-localizes with ACVRL1 and ENG (arrows) in lungs of *Foxf1*<sup>WT-GFP/+</sup> E15.5 mouse embryos. DAPI was used to counterstain cell nuclei. The immunofluorescence staining was independently repeated twice with consistent results. Scale bars are 50μm (top images) and 10μm (bottom images).

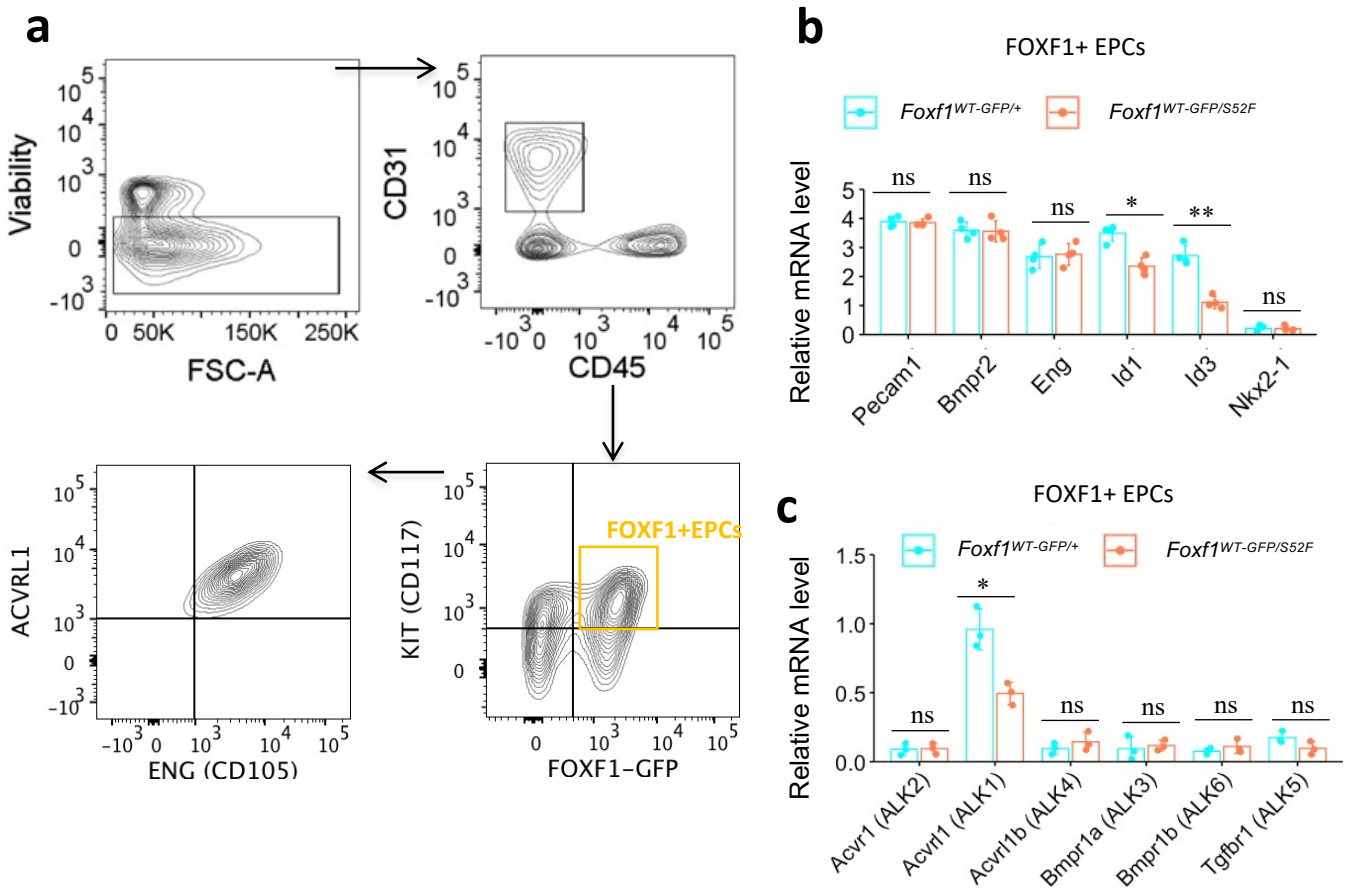

**Supplemental Figure 9. Expression of *Id1*, *Id3* and *Acvr1* is decreased in FOXF1<sup>+</sup> EPCs isolated from *Foxf1*<sup>WT-GFP/S52F</sup> lungs.** *a*, FACS gating strategy shows the isolation of FOXF1<sup>+</sup> gCAPs (FOXF1<sup>+</sup>cKIT<sup>+</sup>CD31<sup>+</sup>CD45<sup>-</sup> cells; FOXF1<sup>+</sup> EPCs) from lungs of *Foxf1*<sup>WT-GFP/+</sup> reporter mice. FACS-sorted FOXF1<sup>+</sup> EPCs express ACVRL1 and ENG receptors on the cell surface. *b-c*, qRT-PCR analysis shows decreased *Id1*, *Id3* and *Acvr1* mRNAs in FACS-sorted FOXF1<sup>+</sup> EPCs from *Foxf1*<sup>WT-GFP/S52F</sup> lungs compared to *Foxf1*<sup>WT-GFP/+</sup> controls (n=4). Expression levels were normalized using  $\beta$ -Actin mRNA, Data were shown as mean  $\pm$  SD, and nonparametric Mann Whitney U test were performed, and p value for *Pecam1* is 0.77186, *Bmpr2* is 0.88336, *Eng* is 0.78076, *Id1* is 0.01341, *Id3*, 0.00197, *Nkx2-1* is 0.99243, *Acvr1* (ALK1) is 0.00892, *Acvr1* (ALK2) is 0.88627, *Bmpr1a* (ALK3) is 0.70214, *Acvr1b* (ALK4) is 0.35451, *Tgfb1* (ALK5) is 0.10324, *Bmpr1b* (ALK6) 0.32937. p<0.05 is \*, p<0.01 is \*\*, ns is not significant.

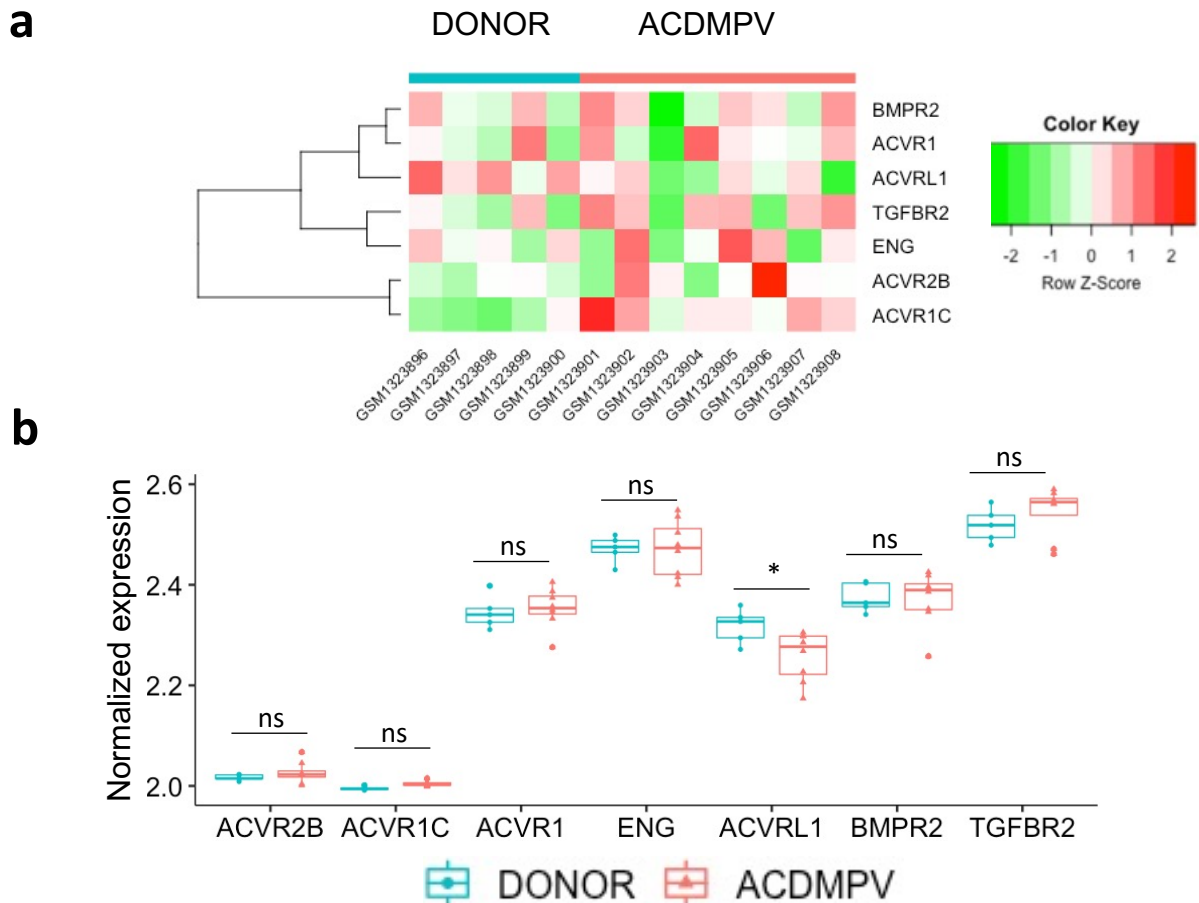

**Supplemental Figure 10. *ACVRL1* mRNA is selectively decreased in human ACDMPV lungs.** Microarray analysis shows expression of mRNA transcripts encoding the Type I and Type II TGF $\beta$ /BMP receptors in ACDMPV (n=8) and donor lungs (n=5). Microarray data are displayed as a heatmap (a) and a boxplot (b). *ACVRL1* mRNA is selectively decreased in ACDMPV lungs. mRNAs encoding other TGF $\beta$ /BMP receptor genes are unchanged. Boxplots: center line, median; box boundary, first and third quartiles; whiskers denote 5<sup>th</sup>–95<sup>th</sup> percentile, and student's T-test (two-tailed) were performed. p<0.05 is \*, p<0.01 is \*\*, ns is not significant.

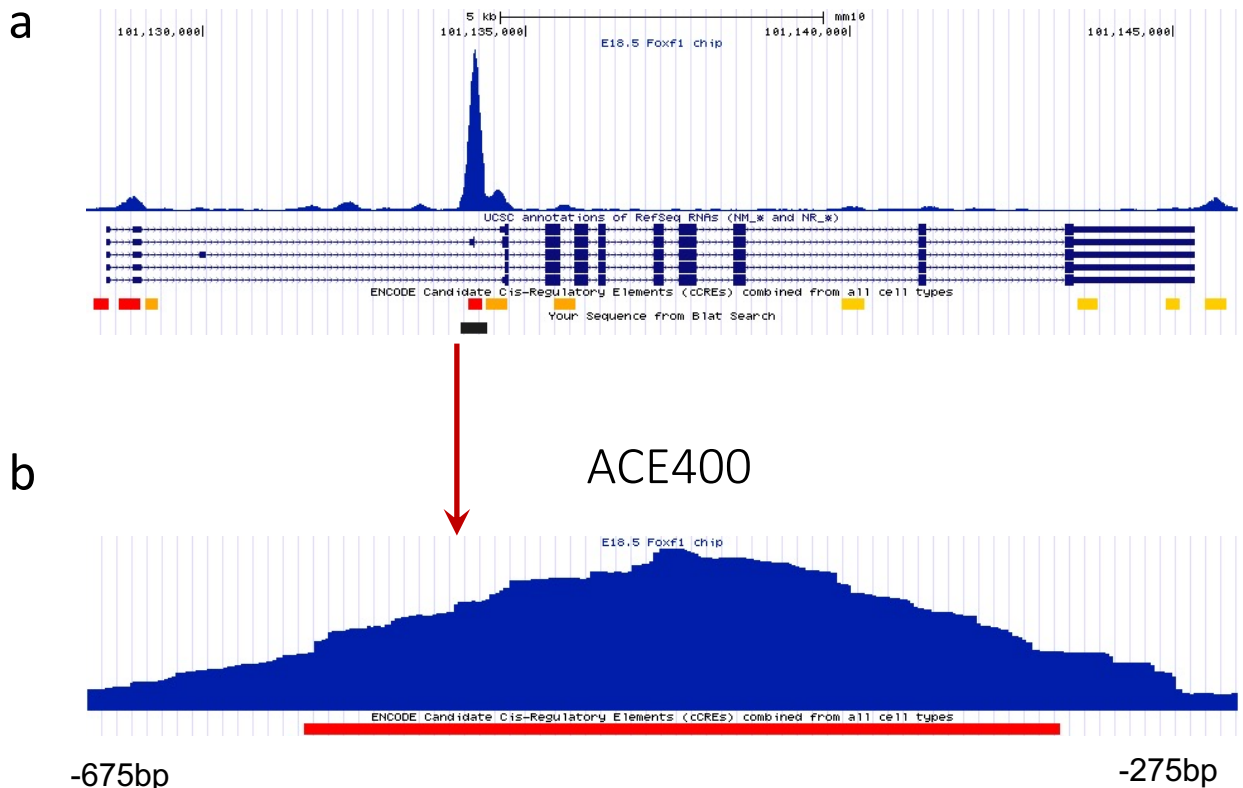

**c**

CAGAGCTGTGTAAGGTACCTACACAAACGTCACACAGTTG  
TCTCTGCTCCTGGTGGTCCCTTTAAACCCCCGTCCCGCTT  
CCAGCCTGCCCTGAGCTCCCTGCTGTGCGTGACTTCAGCC  
TGTTCTATCCAGGCCTCAATC**TAAACAAT**CCTTGATTCCTG  
**TTGCCGGCCTGGCGGGACCCTGA**ATGGCAGGAAGTAAGGA  
CAAGAG**CCTGTTTA**TGTTTGAAGCAGCCAGGCTGGGGGTG  
GGGAGTGGGGGCACTGGGAAACGGTGGGCAGGGGTGGAGG  
CTGGAGCGATGGGCAAACGGCTGAGGACAAGAGATGAGCT  
ATGAGAGAGTCGTCCTTCCCCTGTAGCTCTGTCTGTCTG  
CAACCCTCCCGGCCTATTACCCTCTGAACAGTTGCAGTGG

**Supplemental Figure 11. FOXF1 protein directly binds to ACE400 region in mouse *Acvr1* promoter.** *a*, ChIPseq analysis shows FOXF1-binding regions in mouse *Acvr1* gene. ChIPseq was performed using lung tissue from mouse E18.5 embryos. The black bar indicates ACE400 DNA region. Based on *ENCODE Registry of candidate cis-Regulatory Elements* (cCREs) of the mouse genome, red bars show promoter-like signatures (PLS), whereas yellow bars indicate enhancer-like signatures (pELS). *b*, The detailed view of ACE400 DNA region in UCSC genome browser. The red bar indicates EM10E0612669 cCRE, which derives from the ChIPseq signal of histone methylation markers in P0 mouse lung. *c*, The ACE400 DNA sequence is obtained from *mm10* genome (chr15:101,134,005-101,134,404). Potential FOXF1-binding sites are indicated with green. Bold letters indicate promoter sequences for NM\_001277255 transcript.

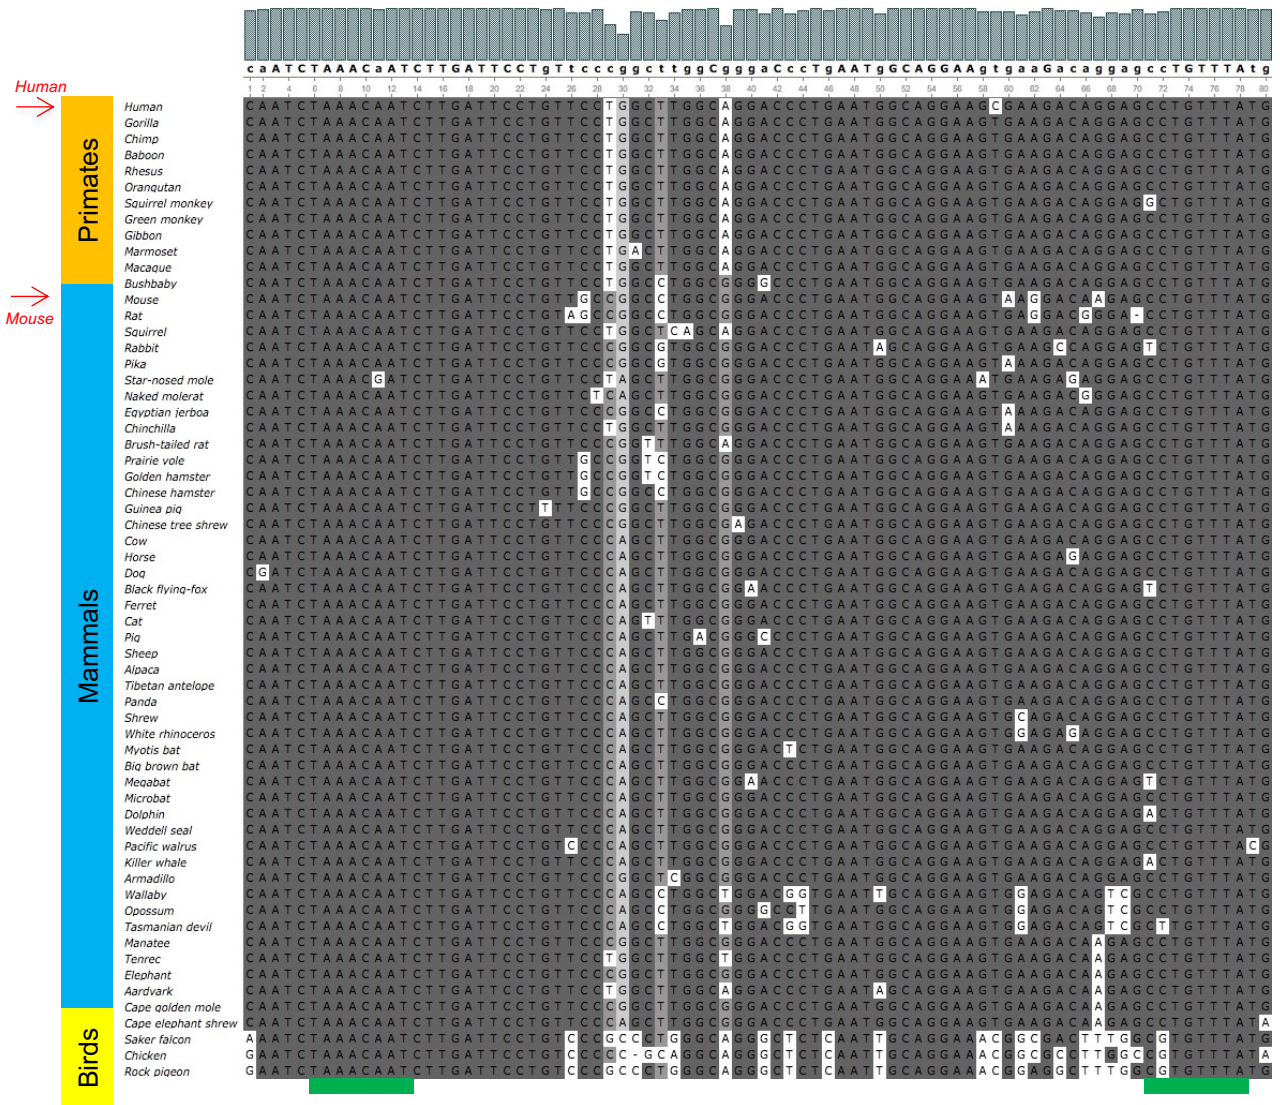

**Supplemental Figure 12. ACE80 DNA region is conserved in mammals and birds.** DNA sequences show the ACE80 region in 60 vertebrate genomes obtained from UCSC genome browser. Sequences are aligned using the ClustalW2 algorithm. Green bars show two evolutionarily conserved FOXF1-binding sites. Vertebrate genomes are classified into Primates, Birds and other mammals (*Laurasiatheria*, *Euarchontoglires* and *Afrotheria*).

**a**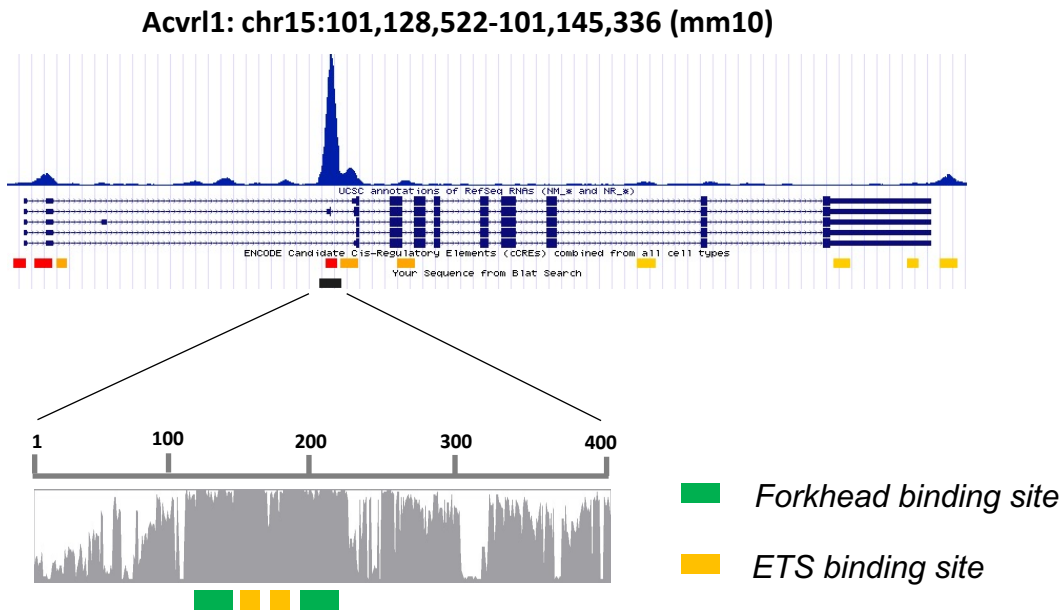**b**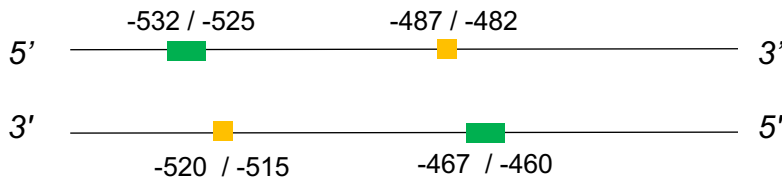**c**

|                   |           |          |             |           |      |
|-------------------|-----------|----------|-------------|-----------|------|
| Mouse             | 5' -CAATC | TAAACAAT | CTT         | GATTCCTG  | T-3' |
| Human             | 5' -CAATC | TAAACAAT | CTT         | GATTCCTG  | T-3' |
| Squirrel          | 5' -CAATC | TAAACAAT | CTT         | GATTCCTG  | T-3' |
| Sheep             | 5' -CAATC | TAAACAAT | CTT         | GATTCCTG  | T-3' |
| Microbat          | 5' -CAATC | TAAACAAT | CTT         | GATTCCTG  | T-3' |
| Elephant          | 5' -CAATC | TAAACAAT | CTT         | GATTCCTG  | T-3' |
| Chicken           | 5' -CAATC | TAAACAAT | CTT         | GATTCCTG  | T-3' |
| *****             |           |          |             |           |      |
| Mouse             | 5' -G     | CAGGAAGT | AAGGACAAGAG | CCTGTTTAT | -3'  |
| Human             | 5' -G     | CAGGAAGC | GAAGACAGGAG | CCTGTTTAT | -3'  |
| Squirrel          | 5' -G     | CAGGAAGT | GAAGACAGGAG | CCTGTTTAT | -3'  |
| Sheep             | 5' -G     | CAGGAAGT | GAAGACAGGAG | CCTGTTTAT | -3'  |
| Microbat          | 5' -G     | CAGGAAGT | GAAGACAGGAG | CCTGTTTAT | -3'  |
| Elephant          | 5' -G     | CAGGAAGT | GAAGACAAGAG | CCTGTTTAT | -3'  |
| Chicken           | 5' -G     | CAGGAAGC | GGCGCCTTGCG | CGTGTTTAT | -3'  |
| ***** * * * ***** |           |          |             |           |      |

█ Forkhead binding site      █ ETS binding site

**d**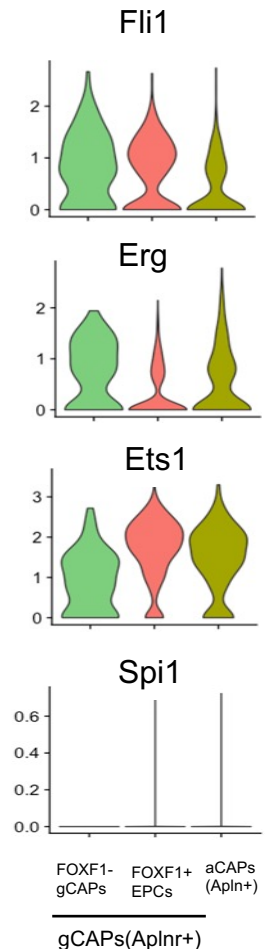

**Supplemental Figure 13. Conserved FOX and ETS binding motifs are present in ACE400 region of *Acvrl1* gene.** *a*, ChIPseq analysis of mouse E18.5 lungs shows FOXF1-binding regions in mouse *Acvrl1* gene. The black bar indicates ACE400 DNA region with 2 *Forkhead* (FOX) and 2 ETS binding motifs. Based on *ENCODE Registry of candidate cis-Regulatory Elements* (cCREs) of the mouse genome, red bars show promoter-like signatures (PLS), whereas yellow bars indicate enhancer-like signatures (pELS). *b*, Schematic shows the position of FOX (green) and ETS binding motifs (yellow) in ACE400 DNA. *c*, UCSC genome browser show that FOX and ETS binding motifs in ACE400 are conserved. *d*, Violin plots show expression profiles of ETS transcription factors *Fli1*, *Erg*, *Ets1* and *Spi1* in aCAPs, FOXF1<sup>-</sup> gCAPs and FOXF1<sup>+</sup> gCAPs (FOXF1<sup>+</sup> EPCs). scRNAseq analysis was performed using *WT* E18.5 lungs.

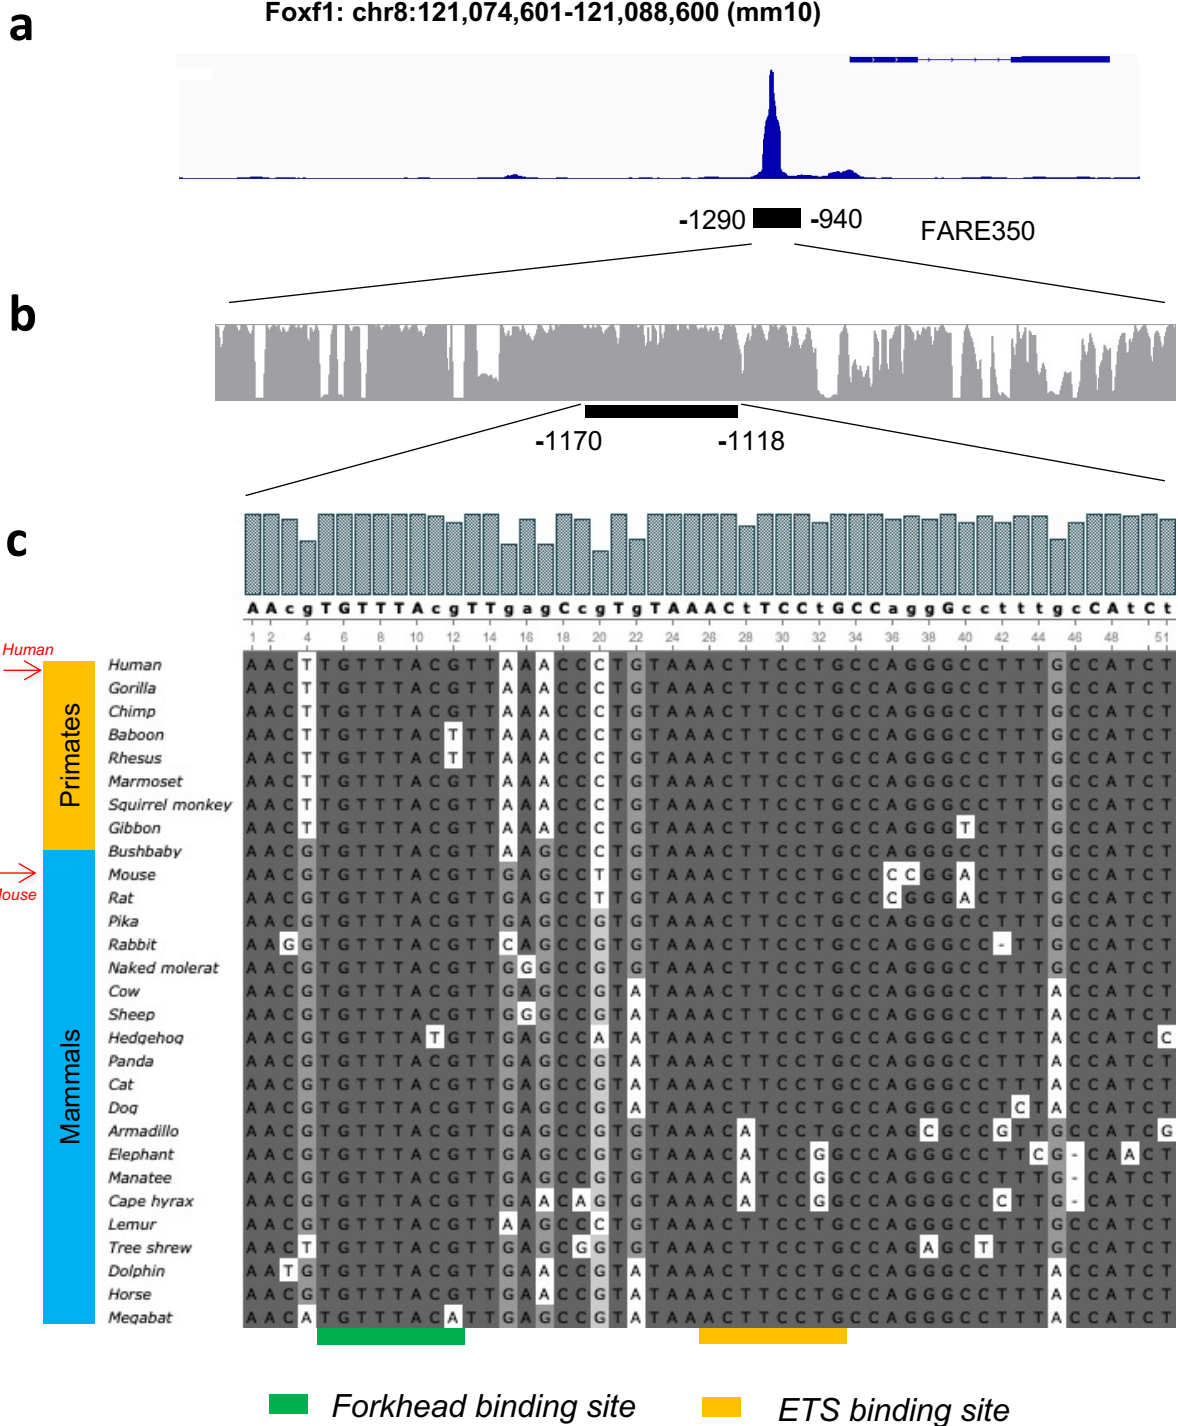

**Supplemental Figure 14. Conserved FOX and ETS binding motifs are present in FARE350 region of *Foxf1* gene.** *a-b*, ChIPseq analysis shows FOXF1-binding regions in FARE350 region of mouse *Foxf1* gene. *c*, The alignment of DNA sequences shows that FARE350 region is conserved in vertebrate genomes obtained from UCSC genome browser. Sequences are aligned using the ClustalW2 algorithm. Evolutionarily conserved FOX (green) and ETS binding motifs (yellow) are present in FARE350.

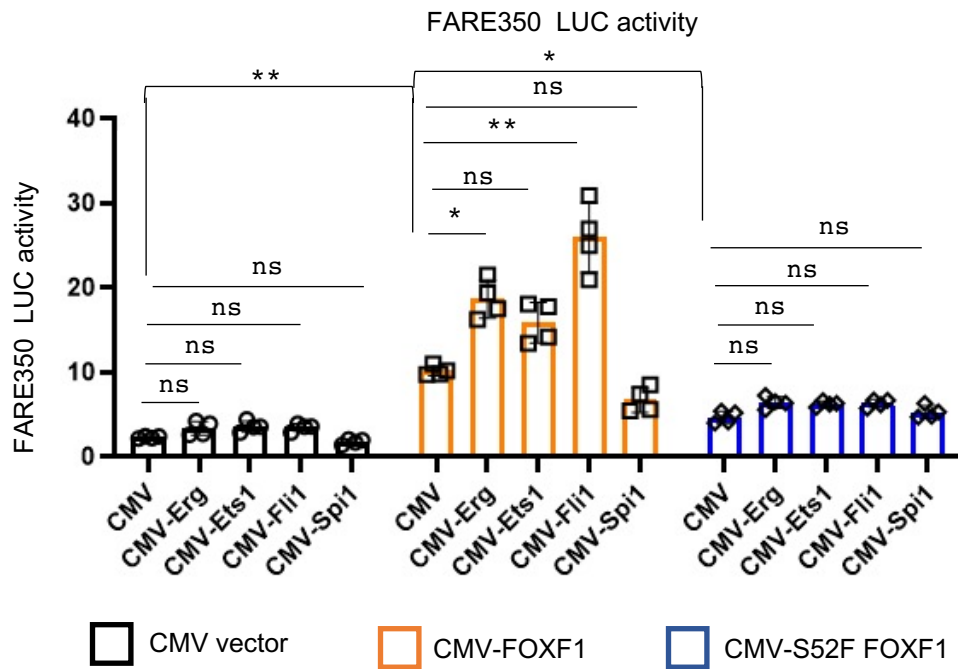

**Supplemental Figure 15. FOXF1 synergizes with FLI1 to stimulate *Foxf1* promoter activity.** Dual luciferase (LUC) assay shows transcriptional synergy between CMV-FOXF1 and CMV-FLI1 expression vectors to activate the FARE350 LUC reporter. Data were presented as mean  $\pm$  SD, and one-way ANOVA followed by Tukey's test (two-tailed) were performed. Co-transfection experiments were performed using fetal lung MFLM-91U cells (n=4),  $p < 0.01$  is \*\*,  $p < 0.05$  is \*, ns is not significant.

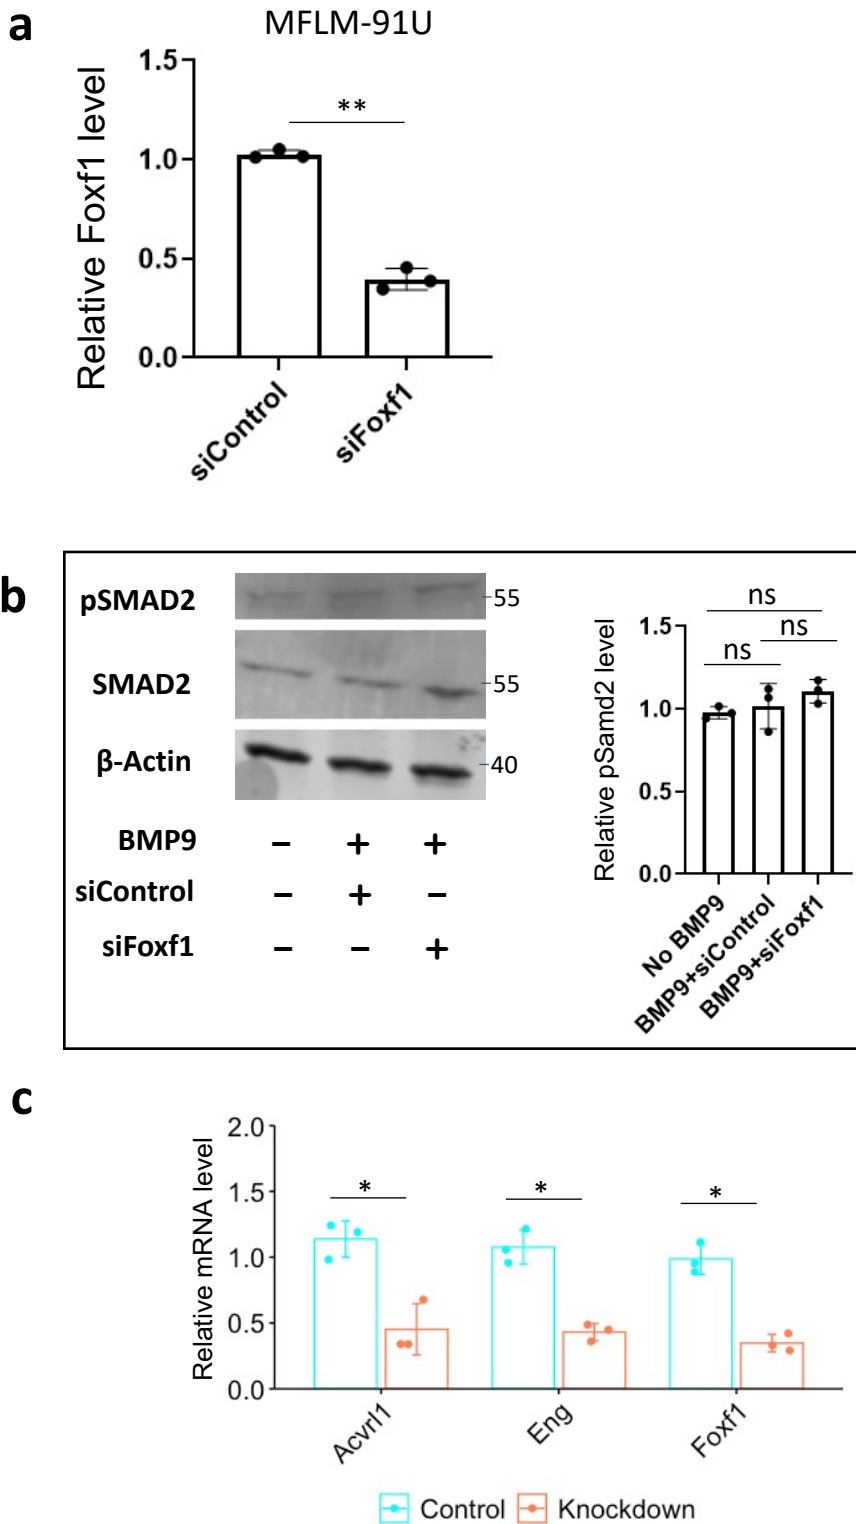

**Supplemental Figure 16. BMP9 treatment changes neither pSMAD2 nor total SMAD2 in MFLM-91U cells *in vitro*.** *a*, qRT-PCR shows that *Foxf1* mRNA is decreased in fetal lung MFLM-91U cells after transfection with *Foxf1*-specific siRNA (siFoxf1). Scrambled siRNA (siControl) was used as a control. Expression levels were normalized to  $\beta$ -Actin mRNA. Data were shown as mean  $\pm$  SD, and nonparametric Mann Whitney U test were performed, and p value is 0.00047. (n=3 biological replicates) *b*, Western blot shows that BMP9 treatment does not change pSMAD2 and total SMAD2 in MFLM-91U cells. Inhibition of *Foxf1* by siRNA has no effect on pSMAD2 and total SMAD2 in BMP9-treated cells (n=3). Data were presented as mean  $\pm$  SD, and one-way ANOVA followed by Tukey's test (two-tailed) were performed. *c*, qRT-PCR shows decreased levels of *Acvrl1*, *Eng* and *Foxf1* mRNAs after siRNA transfection in MFLM-91U cells (n=3). Cells were transfected with siRNAs specific to *Acvrl1*, *Eng* or *Foxf1*. Scrambled siRNA was used as a control. Expression levels were normalized to  $\beta$ -Actin mRNA. Data were shown as mean  $\pm$  SD, and nonparametric Mann Whitney U test were performed, and p values are 0.075509 (*Acvrl1*), 0.01534 (*Eng*), 0.0118 (*Foxf1*). p<0.05 is \*, p<0.01 is \*\*, ns is not significant.

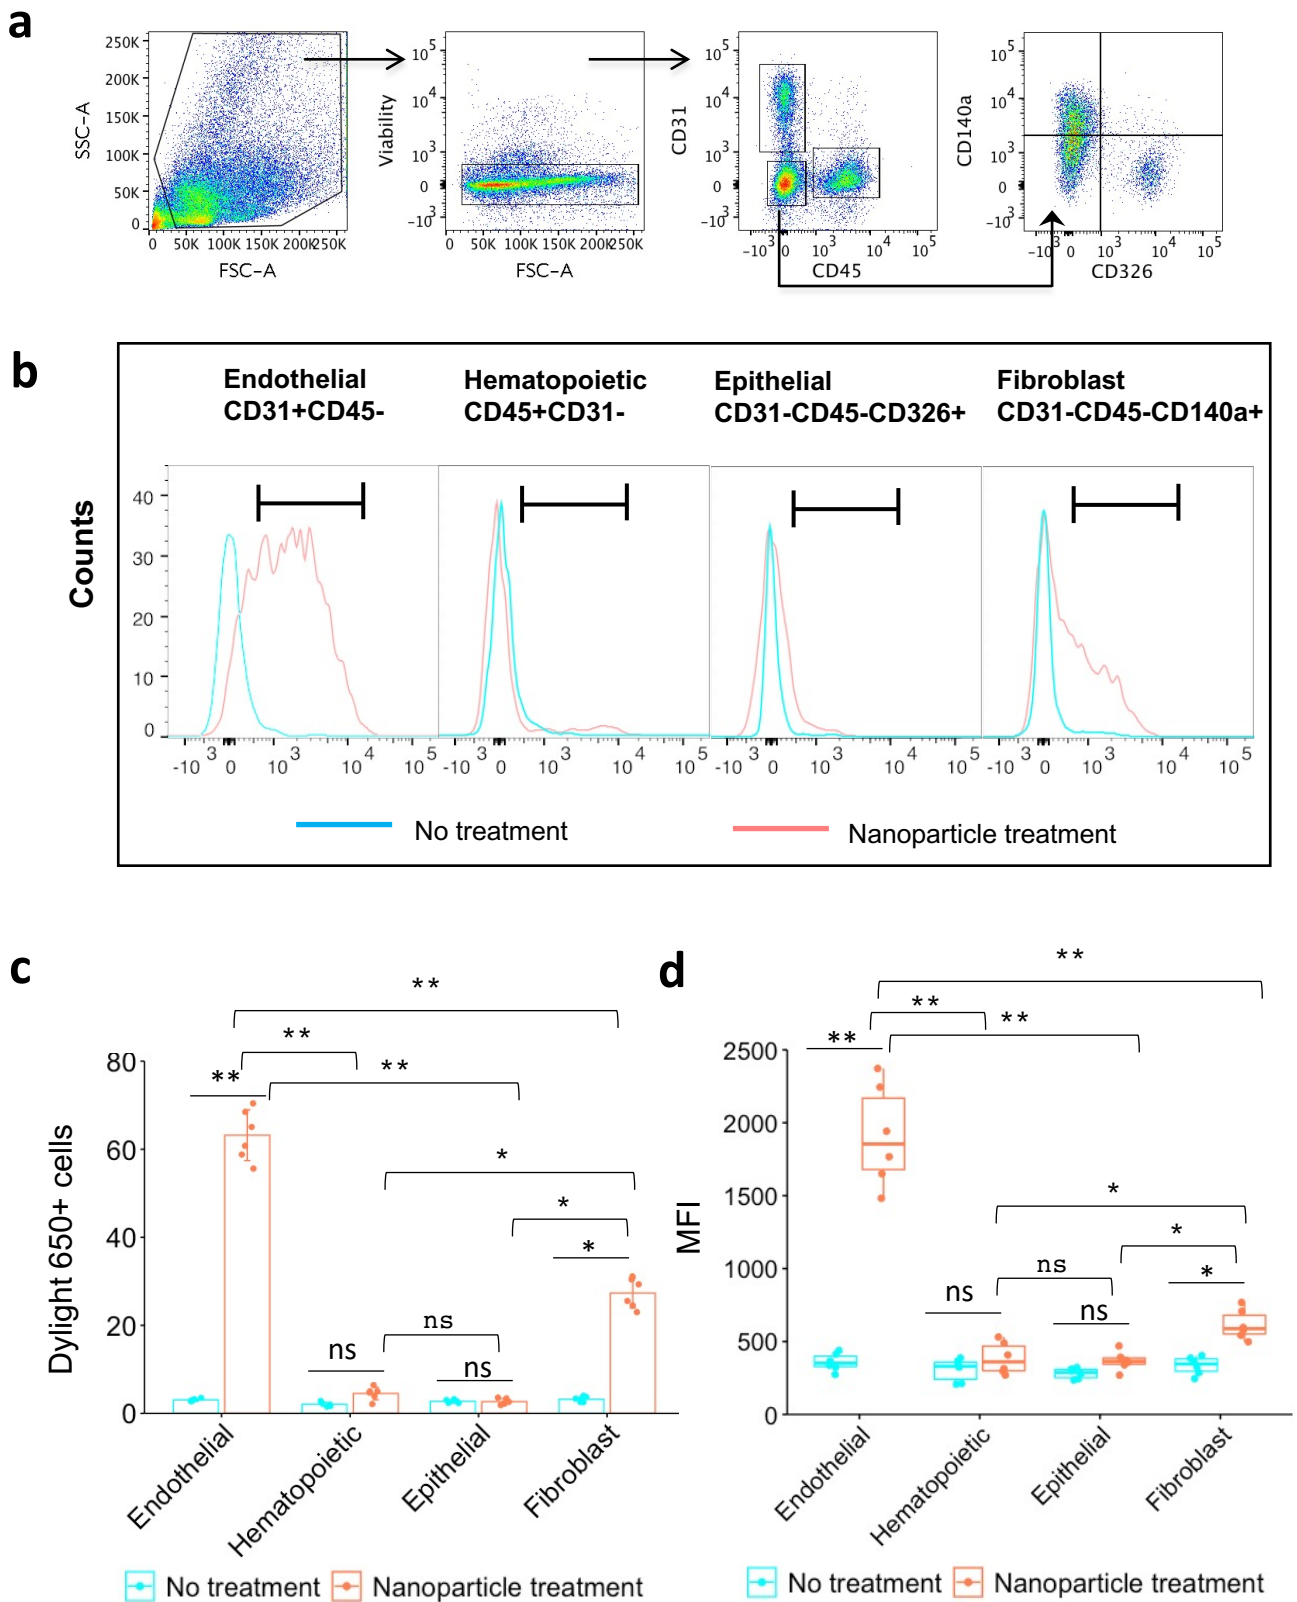

**Supplemental Figure 17. PEI<sub>600</sub>-MA<sub>5</sub>/PEG-OA/Cho nanoparticles target endothelial cells and fibroblasts in the neonatal mouse lung.**

*a*, FACS-gating strategy shows expression of CD31, CD45, CD326 and CD140a in mouse P4 lungs. Pulmonary endothelial cells were identified as CD31<sup>+</sup>CD45<sup>-</sup> cells, whereas hematopoietic cells were identified as CD45<sup>+</sup>CD31<sup>-</sup> cells. Epithelial cells (CD326<sup>+</sup>CD31<sup>-</sup>CD45<sup>-</sup>) and fibroblasts (CD140a<sup>+</sup>CD31<sup>-</sup>CD45<sup>-</sup>) were detected within CD31<sup>-</sup>CD45<sup>-</sup> cell subset. Dylight 650- labeled PEI<sub>600</sub>-MA<sub>5</sub>/PEG-OA/Cho nanoparticles were injected at P2. Lungs were harvested at P4. *b*, Histograms show the presence of nanoparticles in endothelial cells and fibroblasts (red lines). Untreated mice were used as controls (blue lines). *c-d*, Bar graphs show the percentage of cells containing the nanoparticles in each respiratory cell type (*c* Data were presented as mean  $\pm$  SD) and the Mean Fluorescence Intensity (MFI) for Dylight 650 (*d* Boxplots: center line, median; box boundary, first and third quartiles; whiskers denote 5<sup>th</sup>–95<sup>th</sup> percentile). MFI of Dylight 650 indicates the amounts of nanoparticles that are present in endothelial, hematopoietic, epithelial cells and fibroblasts (n=6 mice per group). The largest percentage of Dylight 650-positive cells and the largest nanoparticle load are detected in endothelial cells. One-way ANOVA followed by Tukey's test (two-tailed) were performed,  $p < 0.05$  is \*,  $p < 0.01$  is \*\*, ns is not significant.

**a**

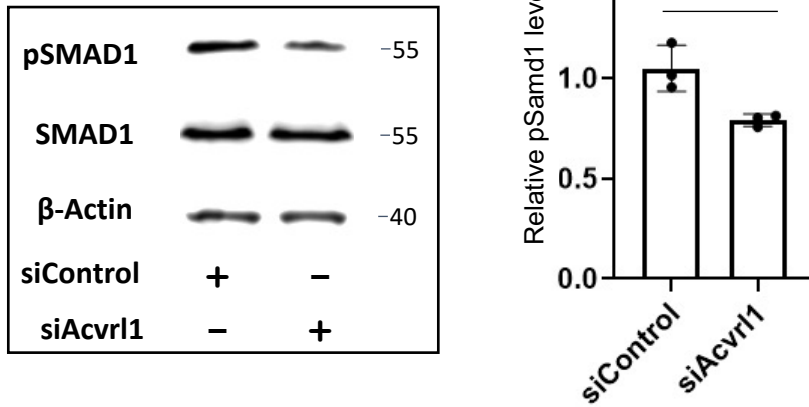

**b**

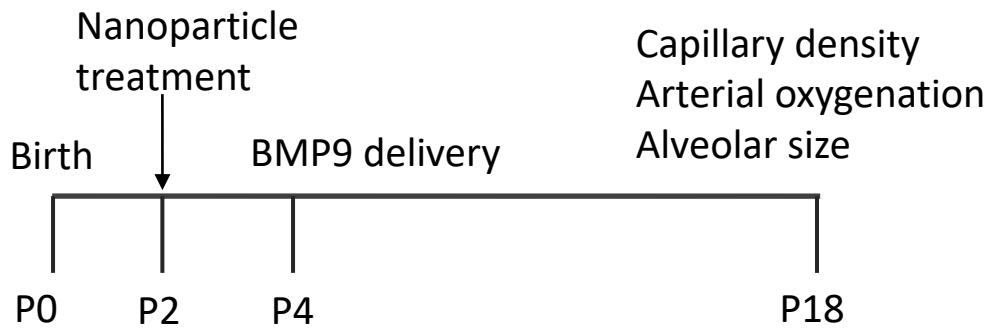

**c**

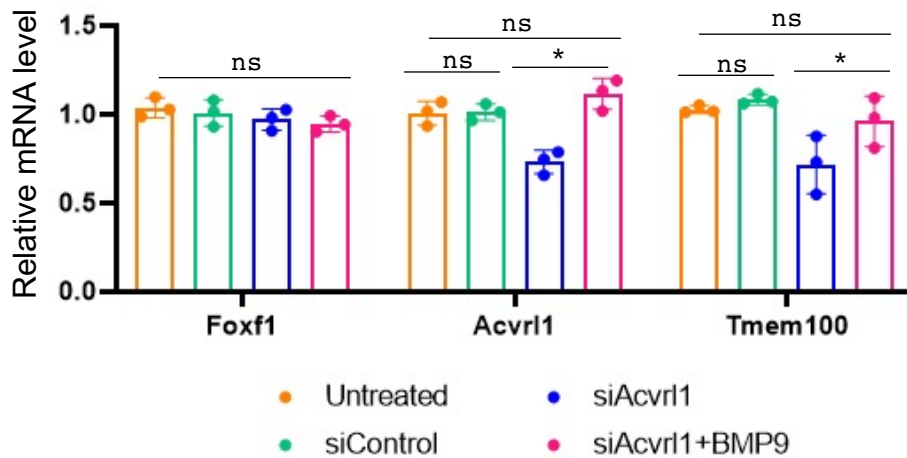

**Supplemental Figure 18. BMP9 treatment increases *Acvrl1* and *Tmem100* mRNAs in purified pulmonary endothelial cells from *siAcvrl1*-treated mice.** *a*, Western blot shows that nanoparticle-mediated delivery of *Acvrl1* siRNA (*siAcvrl1*) decreases pSMAD1 in mouse lungs (n=3). Nanoparticles with scrambled siRNA were used as a control (*siControl*). Nanoparticles were delivered i.v. to P2 mice. Lungs were harvested at P4. Data were presented as mean  $\pm$  SD, and T-test (two-tailed) analyses were performed with GraphPad Prism, P value = 0.01979. *b*, Schematic shows treatments of *WT* and *Foxf1*<sup>WT/S52F</sup> neonatal mice with siRNA-containing nanoparticles at P2 and recombinant BMP9 at P4. Mice were examined at P18. *c*, qRT-PCR shows that BMP9 treatment increases *Acvrl1* and *Tmem100* mRNAs in purified pulmonary endothelial cells from *siAcvrl1*-treated mice (n=3). Data were presented as mean  $\pm$  SD, and one-way ANOVA followed by Tukey's test (two-tailed) were performed. P values are 0.01867 (*Acvrl1*), and 0.02043 (*Tmem100*). p<0.05 is \*, ns is not significant. Endothelial cells were purified from the lung tissue using immunomagnetic beads as CD31<sup>+</sup>CD45<sup>-</sup> cells. BMP9 treatment did not change *Foxf1* mRNA in lung endothelial cells.

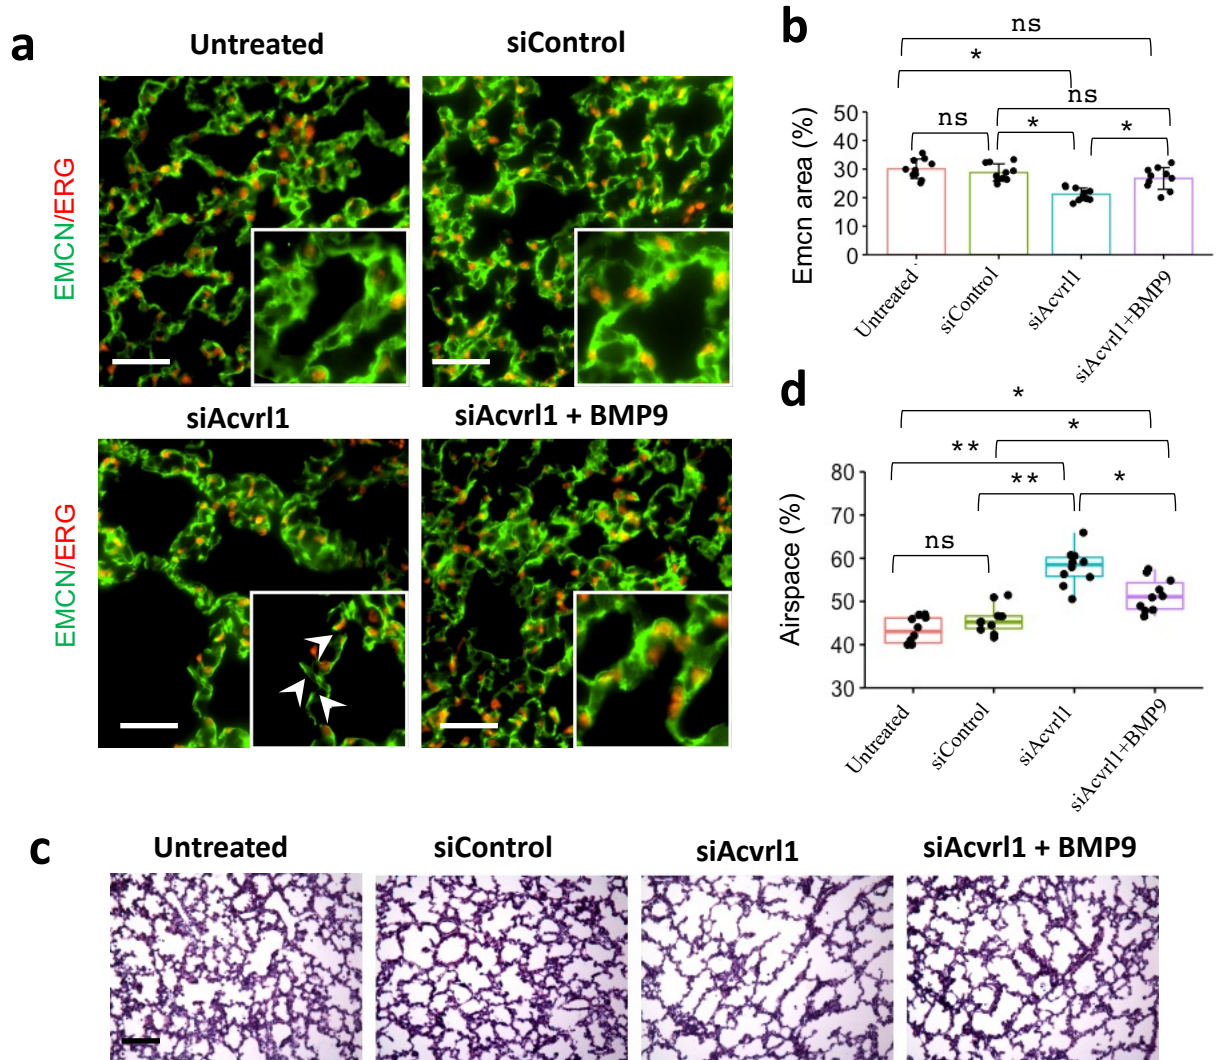

**Supplemental Figure 19. BMP9 treatment increases alveolar capillary density and improves alveologenesis in *siAcvr1*-treated mice.** *a-b*, Alveolar capillary density is decreased after nanoparticle delivery of *Acvr1* siRNA. Data were presented as mean  $\pm$  SD. Nanoparticles were delivered at P2. Immunostaining for endothelial markers endomucin (EMCN) and ERG was performed using P18 mouse lungs (n=10). Alveolar capillary density is restored after administration of BMP9. BMP9 treatment was performed at P4. Scale bars are 20 $\mu$ m. *c-d*, Nanoparticle delivery of *Acvr1* siRNA causes alveolar simplification as shown by increased sizes of alveoli. BMP9 treatment decreases alveolar simplification in *siAcvr1*-treated mice. Alveolar sizes were measured using H&E-stained lung sections from P18 mice (n=10). Boxplots: center line, median; box boundary, first and third quartiles; whiskers denote 5<sup>th</sup>–95<sup>th</sup> percentile. Scale bars are 50 $\mu$ m. (b-d) One-way ANOVA followed by Tukey's multiple comparison test (two-tailed) were performed.  $p < 0.01$  is \*\*,  $p < 0.05$  is \*, ns is not significant.

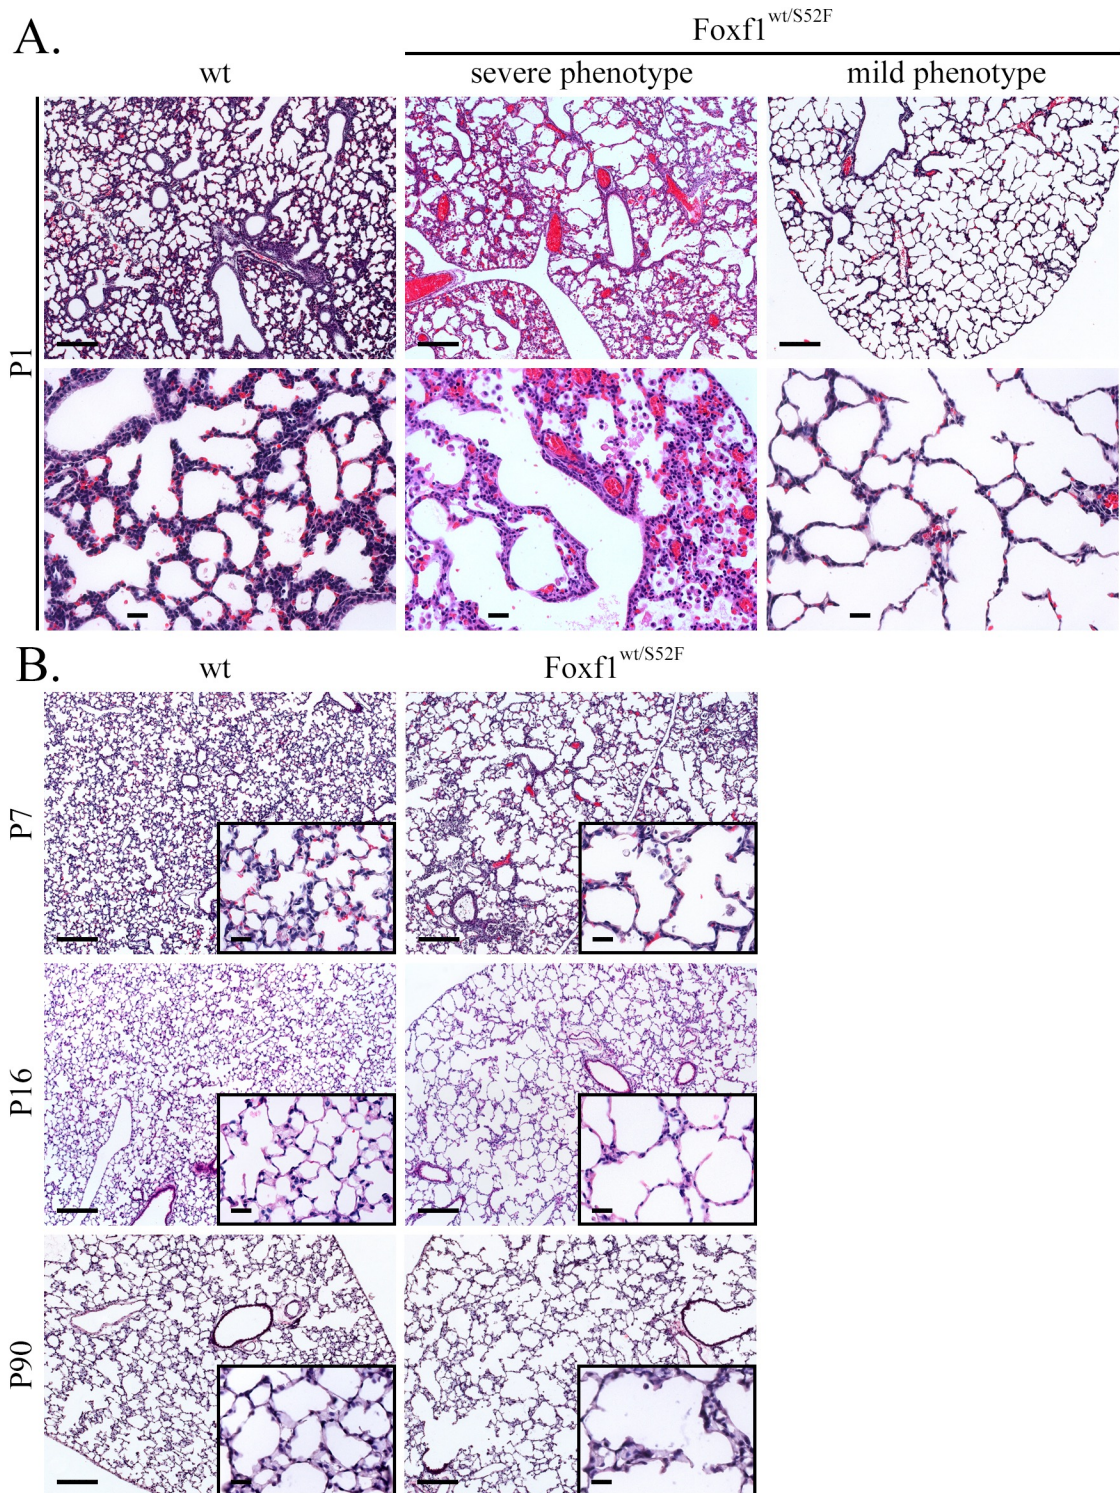

**Supplemental Figure 20. H&E staining shows severe and mild phenotypes in *Foxf1*<sup>WT/S52F</sup> mutant mice.** *a*, Newborn *Foxf1*<sup>WT/S52F</sup> mutant mice with the most severe phenotype exhibit lung inflammation, hemorrhage, and alveolar simplification which cause early neonatal lethality. Newborn *Foxf1*<sup>WT/S52F</sup> mutant mice with the mild phenotype exhibit alveolar simplification without hemorrhage and inflammation. *b*, H&E staining shows lung histology in wild type (wt) and surviving *Foxf1*<sup>WT/S52F</sup> littermates at P7, P16 and P90. The experiments were repeated twice with similar results. Scale bars are 200μm for low magnification, and 25μm for high magnification.

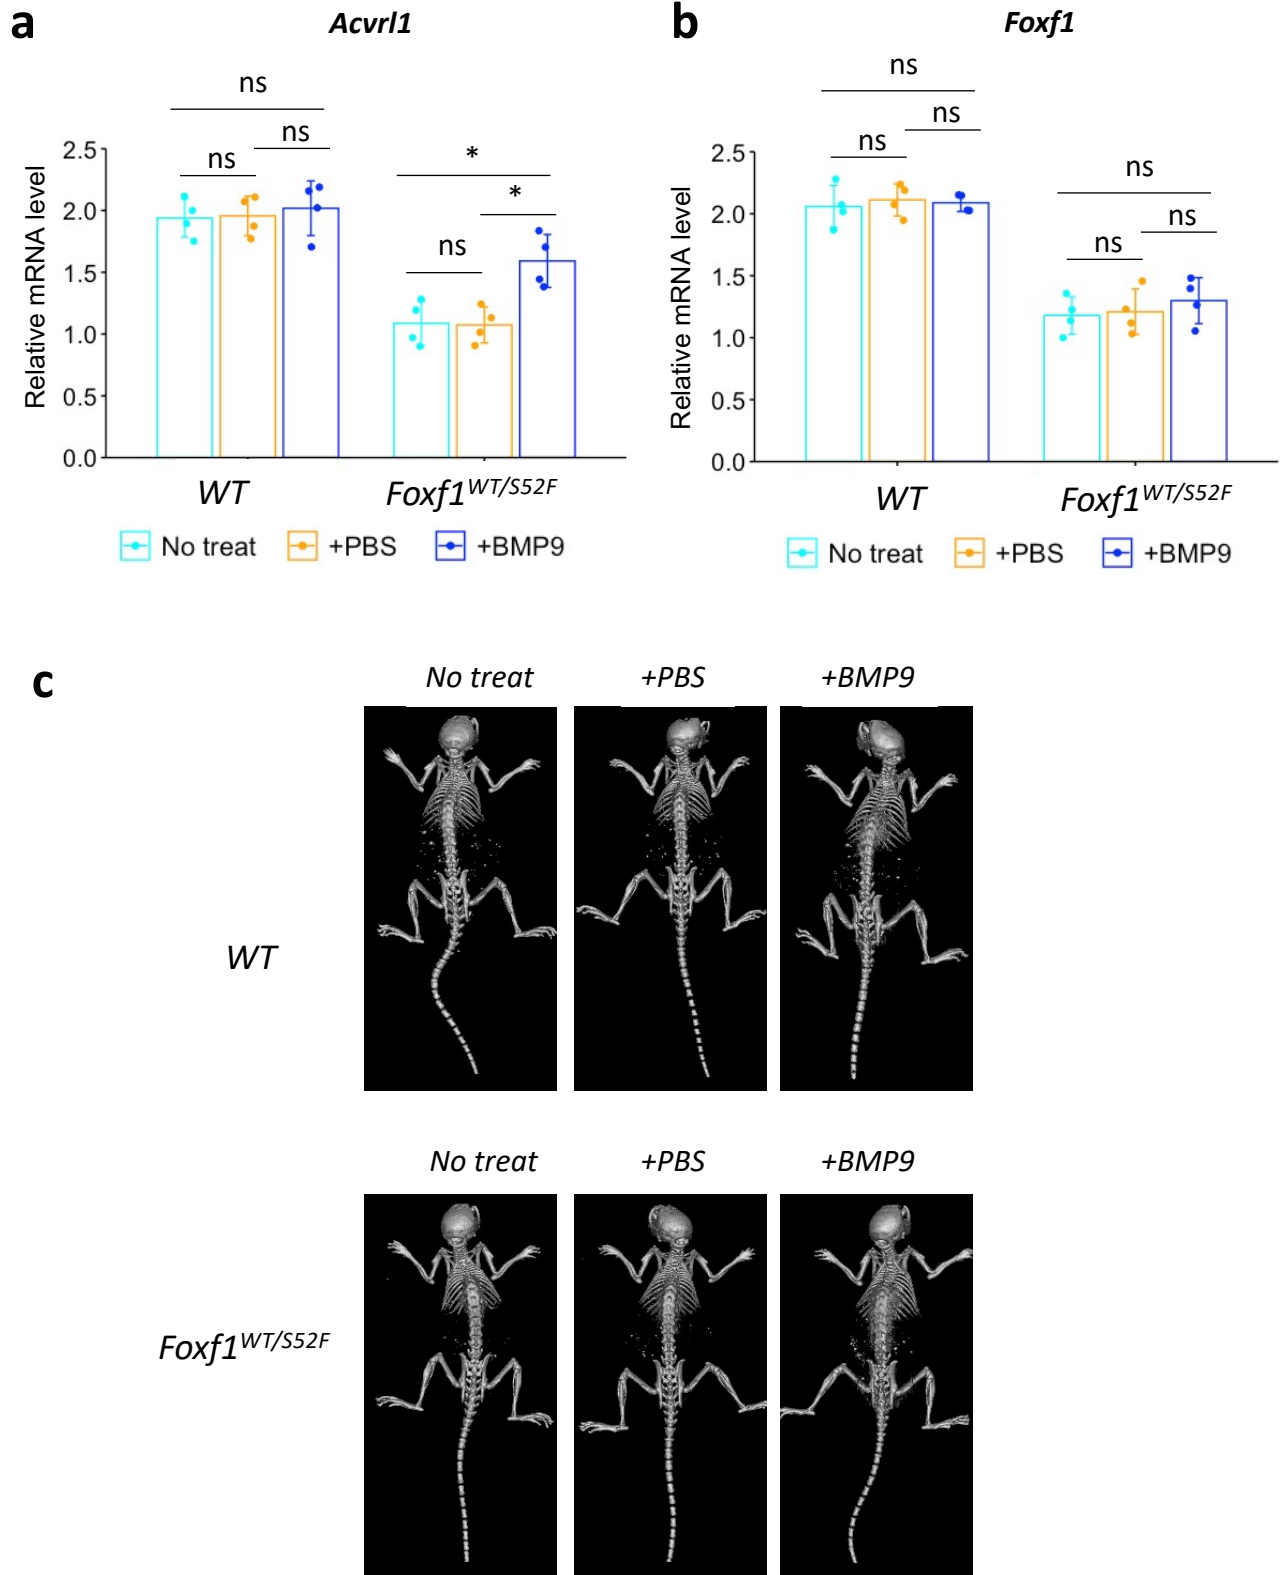

**Supplemental Figure 21. BMP9 treatment increases *Acvr1* expression in *Foxf1*<sup>WT/S52F</sup> lungs.** *a*, qRT-PCR shows that BMP9 administration increases *Acvr1* mRNA in lung tissue of *Foxf1*<sup>WT/S52F</sup> mutant mice but not in *WT* mice. Nanoparticles were delivered at P3, and lungs were harvested at P18. (n=4 mice) *b*, *Foxf1* mRNA was unaltered after BMP9 treatment of *Foxf1*<sup>WT/S52F</sup> and *WT* mice. (n=4 mice) (a-b) Data were shown as mean  $\pm$  SD. One-way ANOVA followed by Tukey's test (two-tailed) were performed, and p values are 0.01456 (BMP9 vs No treat), 0.01869 (BMP9 vs PBS). p<0.05 is \*, p<0.01 is \*\*, ns is not significant. *c*, microCT images show that BMP9 treatment does not cause abnormal ossification or ectopic bone formation in *Foxf1*<sup>WT/S52F</sup> or *WT* littermates.

WT EPCs

*Foxf1*<sup>WT/S52F</sup> EPCs

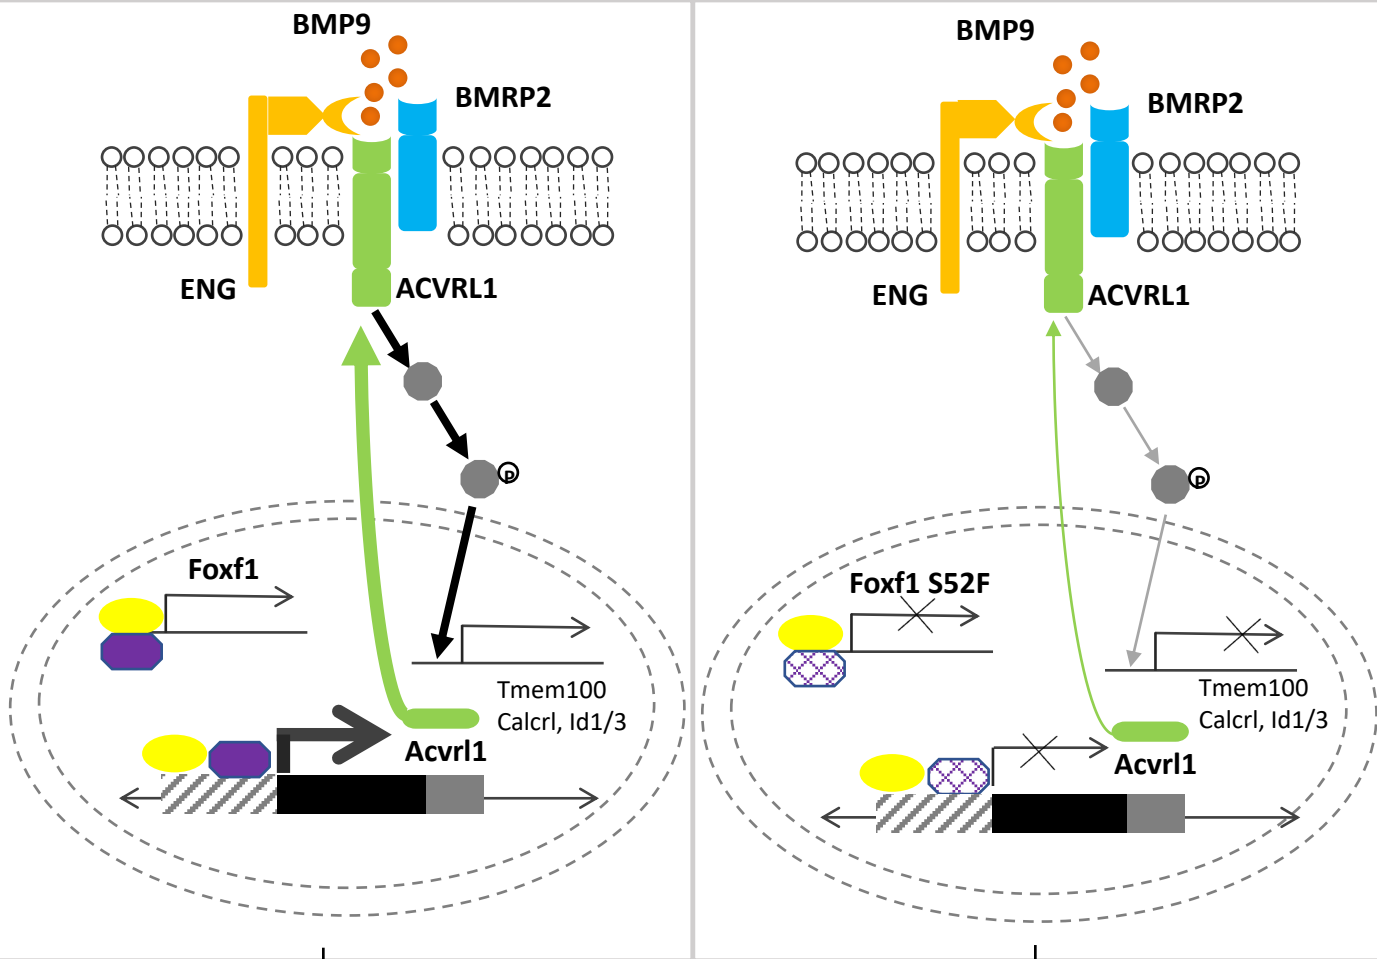

Normal neonatal lung angiogenesis

Diminished neonatal lung angiogenesis

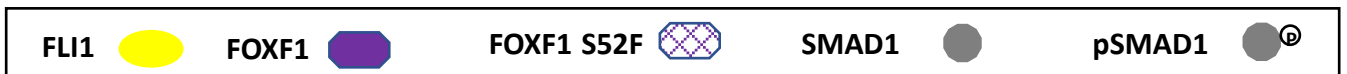

**Supplemental Figure 22. Model of FOXF1-mediated regulation of BMP9/ACVRL1/SMAD1 signaling in FOXF1<sup>+</sup> EPCs.** Diagrams show regulation of the BMP9/ACVRL1 signaling pathway in WT (left panel) and FOXF1 mutant (*Foxf1*<sup>WT/S52F</sup>) EPCs (right panel). FOXF1 synergizes with ETS transcription factor FLI1 to stimulate transcription of *Acvr1* and *Foxf1* genes in FOXF1<sup>+</sup> EPCs. Together with BMPR2 and ENG, ACVRL1 protein forms a receptor complex for BMP9, which activates gene expression through phosphorylation of SMAD1 (pSMAD1). *Foxf1*<sup>WT/S52F</sup> EPCs exhibit decreased ACVRL1 mRNA and protein, causing decreased cell surface expression of ACVRL1 and reduced BMP9/ACVRL1/pSMAD1 signaling which leads to diminished neonatal lung angiogenesis.

Uncropped blots for Fig7b

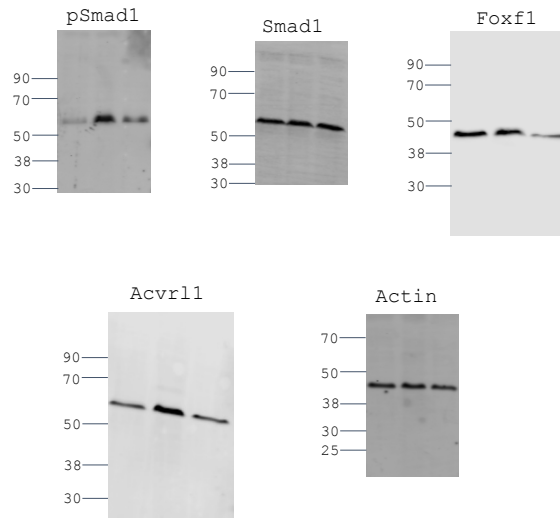

Uncropped blots for  
Suppl. Fig16b

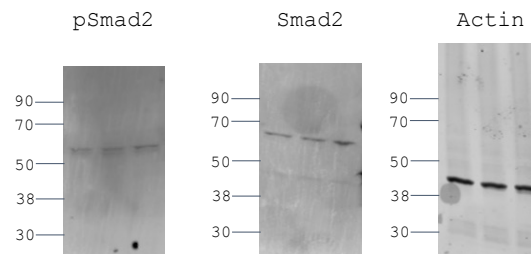

Uncropped blots for  
Suppl. Fig18a

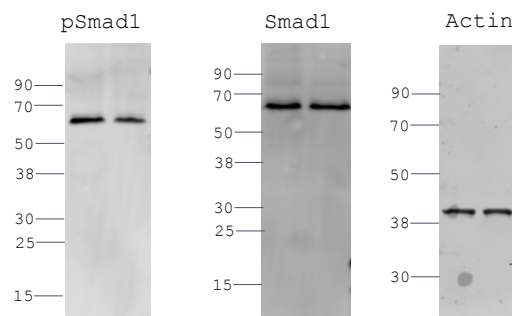

**Supplemental Figure 23. The uncropped western blots.**
